# Supplementary material for: 4-Hydroxybenzaldehyde derived Schiff base gelators: case of the sustainability or rupturing of imine bonds towards the selective sensing of Ag+and Hg2+ionsviasol–gel methodology
Source: Royal Society of Chemistry journal article supplement (doi:10.1039/c8nj05056b), 2019-01-01

## Supporting Information

### 4-Hydroxybenzaldehyde derived Schiff base gelators: Case of sustainability or rupturing of imine bonds towards selective sensing of Ag<sup>+</sup> and Hg<sup>2+</sup> ions

Atanu Panja and Kumaresh Ghosh\*

Department of Chemistry, University of Kalyani, Kalyani, Nadia-741235, India,  
Email: ghosh\_k2003@yahoo.co.in, kumareshchem18@klyuniv.ac.in, Fax: +91 33258282

**Table S1:** List of different Hg<sup>2+</sup> ion responsive supramolecular gelators

| Structure                                                                                                                                                                           | Solvent                                              | Phase transformation in presence of Hg <sup>2+</sup> ions | Interfering metal ions             | Detection limit for Hg <sup>2+</sup> (M) | Ref.                                                       |
|-------------------------------------------------------------------------------------------------------------------------------------------------------------------------------------|------------------------------------------------------|-----------------------------------------------------------|------------------------------------|------------------------------------------|------------------------------------------------------------|
| 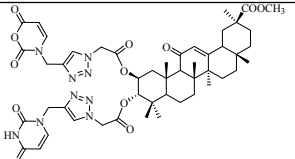                                                                                                   | 1,2-dichloroethane                                   | Gel to Sol                                                | -                                  | -                                        | <i>Org. Lett.</i> , 2011, <b>13</b> , 3372.                |
|                                                                                                   | 1,2-dichloroethane                                   | Gel to Sol                                                | -                                  | -                                        | <i>New J. Chem.</i> , 2013, <b>37</b> , 2419.              |
| <br>R =       | CHCl <sub>3</sub> :CH <sub>3</sub> O<br>H (2:1, v/v) | Gel to Sol                                                | Cu <sup>2+</sup> , Ag <sup>+</sup> | -                                        | <i>New J. Chem.</i> , 2016, <b>40</b> , 3476.              |
|                                                                                                  | 0.2 N HCl                                            | Sol to gel                                                | -                                  | -                                        | <i>Chem. Commun.</i> , 2014, <b>50</b> , 734.              |
|                                                                                                  | DMSO : H <sub>2</sub> O<br>= (1 : 6, v/v)            | Gel to Sol                                                | Cu <sup>2+</sup> , Ag <sup>+</sup> | 2.02 x 10 <sup>-6</sup>                  | <i>Mater. Chem. Front.</i> , 2018, <b>2</b> , 385.         |
|                                                                                                  | DMF : H <sub>2</sub> O =<br>(1 : 1, v/v)             | Gel to Sol                                                | Cu <sup>2+</sup>                   | 2.61 x 10 <sup>-6</sup>                  | <i>New J. Chem.</i> , 2018,<br>DOI:10.1039/C8<br>NJ02426J. |
|                                                                                                  | DMF : H <sub>2</sub> O =<br>(1 : 1, v/v)             | Sol to gel<br>Chemodosimetric approach                    | -                                  | 5.71 x 10 <sup>-6</sup>                  | <i>Supramol. Chem.</i> , 2018, <b>30</b> , 722.            |
| <br>4<br>R =  | DMF : H <sub>2</sub> O =<br>(1 : 1, v/v)             | Sol to gel<br>Chemodosimetric approach                    | -                                  | 5.51 x 10 <sup>-6</sup>                  | <i>Present work</i>                                        |

**Table S2:** List of different Ag<sup>+</sup> ion responsive supramolecular gelators

| Structure                                                                           | Solvent                                                   | Phase transformation in presence of Ag <sup>+</sup> ions | Interfering metal ions | Detection limit for Ag <sup>+</sup> (M) | Ref.                                              |
|-------------------------------------------------------------------------------------|-----------------------------------------------------------|----------------------------------------------------------|------------------------|-----------------------------------------|---------------------------------------------------|
| 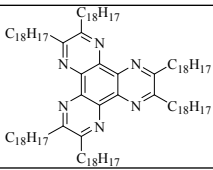   | EtOH                                                      | Gel to sol                                               | -                      | -                                       | <i>Tetrahedron Lett.</i> 2012, <b>53</b> , 1840.  |
|    | MeOH                                                      | Sol to gel                                               | -                      | -                                       | <i>Chem. Commun.</i> 2013, <b>49</b> , 4181.      |
|    | MeOH:H <sub>2</sub> O (1:1, v/v)                          | Sol to gel                                               | -                      | -                                       | <i>Supramol. Chem.</i> 2014, <b>26</b> , 39.      |
|    | THF/ H <sub>2</sub> O                                     | Sol to gel                                               | -                      | -                                       | <i>Soft Matter</i> , 2011, <b>7</b> , 2412.       |
|   | H <sub>2</sub> O                                          | Sol to gel                                               | -                      | -                                       | <i>Soft Matter</i> , 2012, <b>8</b> , 6557.       |
|  | DMF: H <sub>2</sub> O (2:3, v/v)                          | Sol to gel                                               | -                      | -                                       | <i>Cryst. Growth Des.</i> 2015, <b>15</b> , 4635. |
|  | CH <sub>2</sub> Cl <sub>2</sub> , CHCl <sub>3</sub> , THF | Sol to gel                                               | -                      | -                                       | <i>Langmuir</i> , 2012, <b>28</b> , 27.           |
|  | Toluene: EtOH (99:1, v/v)                                 | Sol to gel                                               | -                      | -                                       | <i>Chem. Commun.</i> 2015, <b>51</b> , 13929.     |
|  | DMF, DMF/ H <sub>2</sub> O, DMSO/ H <sub>2</sub> O        | Sol to gel                                               | -                      | -                                       | <i>Cryst. Growth Des.</i> 2015, <b>15</b> , 5360. |

|                                                                                                                                                                                                                                                                                                                |                                                  |            |                                     |                         |                                                |
|----------------------------------------------------------------------------------------------------------------------------------------------------------------------------------------------------------------------------------------------------------------------------------------------------------------|--------------------------------------------------|------------|-------------------------------------|-------------------------|------------------------------------------------|
| 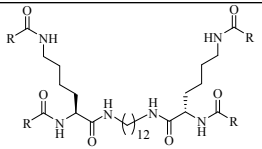 <p>R = <math>C_7H_{15}</math>  <math>C_7H_{15}</math> </p> | EtOAc                                            | Gel to sol | Li <sup>+</sup>                     | -                       | <i>Chem. Commun.</i> 2012, <b>48</b> , 2767.   |
|  <p>R = </p>                                                                                                                                 | DMF : H <sub>2</sub> O (1:1, v/v)                | Sol to gel | -                                   | 4.31 x 10 <sup>-5</sup> | <i>ChemistrySelect</i> , 2017, <b>2</b> , 959. |
|  <p>a. X = Y = CH; Z = N<br/>b. X = Z = CH; Y = N<br/>c. Y = Z = CH; X = N</p>                                                                                                                                                | DMSO: H <sub>2</sub> O                           | Sol to gel | -                                   | -                       | <i>Dalton Trans.</i> , 2017, <b>46</b> , 2793. |
|  <p>OC<sub>16</sub>H<sub>33</sub></p>                                                                                                                                                                                         | Toluene/ethanol (10:1, v/v)                      | Sol to gel | -                                   | -                       | <i>Langmuir</i> , 2007, <b>23</b> , 8217.      |
|  <p>R = </p>                                                                                                                                 | Diphenyl ether                                   | Sol to gel | -                                   | -                       | <i>Chem. Lett.</i> , 2003, <b>32</b> , 12.     |
|                                                                                                                                                                                                                              | THF-H <sub>2</sub> O (3 : 2)                     | Sol to gel | -                                   | -                       | <i>New J. Chem.</i> , 2010, <b>34</b> , 2261.  |
|                                                                                                                                                                                                                             | H <sub>2</sub> O                                 | Sol to gel | -                                   | -                       | <i>New J. Chem.</i> , 2014, <b>38</b> , 2470.  |
|  <p>R = </p>                                                                                                                             | CHCl <sub>3</sub> :CH <sub>3</sub> OH (2:1, v/v) | Gel to Sol | Cu <sup>2+</sup> , Hg <sup>2+</sup> | -                       | <i>New J. Chem.</i> , 2016, <b>40</b> , 3476.  |
|                                                                                                                                                                                                                             | DMSO: H <sub>2</sub> O (1:1, v/v)                | Sol to gel | Cu <sup>2+</sup>                    | -                       | <i>New J. Chem.</i> , 2018, <b>42</b> , 6488.  |
|                                                                                                                                                                                                                                                                                                                |                                                  |            | -                                   | -                       |                                                |

|  |                                                |            |                                     |                         |                                                    |
|--|------------------------------------------------|------------|-------------------------------------|-------------------------|----------------------------------------------------|
|  | DMSO:<br>H <sub>2</sub> O                      | Gel to sol | Cu <sup>2+</sup>                    | 3.69 x 10 <sup>-6</sup> | <i>Mater. Chem. Front.</i> , 2018, <b>2</b> , 385. |
|  | DMSO:<br>H <sub>2</sub> O                      | Gel to sol | Cu <sup>2+</sup> , Hg <sup>2+</sup> | 3.34 x 10 <sup>-6</sup> |                                                    |
|  | DMSO:<br>H <sub>2</sub> O                      | Sol to gel | -                                   | 1.93 x 10 <sup>-7</sup> |                                                    |
|  | DMSO:<br>H <sub>2</sub> O                      | Sol to gel | -                                   | 1.28 x 10 <sup>-6</sup> |                                                    |
|  | 1,4-dioxane-<br>MeOH (1:1,<br>v/v)             | Gel to sol | -                                   | 3.27 x 10 <sup>-5</sup> | <i>Present work</i>                                |
|  | 1,4-dioxane-<br>H <sub>2</sub> O (1:1,<br>v/v) | Sol to gel | -                                   | 9.27 x 10 <sup>-5</sup> |                                                    |

**Table S3:** Results of gelation tests for **1-5**

| Solvent                                                      | 1                   | 2                   | 3                  | 4  | 5        |
|--------------------------------------------------------------|---------------------|---------------------|--------------------|----|----------|
| CHCl <sub>3</sub>                                            | S                   | S                   | S                  | S  | S        |
| 2% Methanol in CHCl <sub>3</sub>                             | S                   | S                   | S                  | S  | S        |
| CHCl <sub>3</sub> : MeOH (1:1, v/v)                          | PG                  | <b>G</b> (12 mg/mL) | S                  | S  | S        |
| CHCl <sub>3</sub> : MeOH (1:2, v/v)                          | <b>G</b> (54 mg/mL) | <b>G</b> (9 mg/mL)  | P                  | P  | S        |
| THF                                                          | S                   | S                   | S                  | S  | S        |
| CH <sub>3</sub> CN                                           | PS                  | I                   | I                  | PS | <b>G</b> |
| DMSO                                                         | PS                  | I                   | I                  | PS | PG       |
| MeOH                                                         | I                   | I                   | I                  | I  | PS       |
| DMF                                                          | S                   | S                   | PG                 | S  | S        |
| Petroleum ether                                              | PS                  | PS                  | PS                 | PS | PS       |
| DMF : H <sub>2</sub> O (1:1, v/v)                            | P                   | P                   | P                  | P  | <b>G</b> |
| 1,4-Dioxane : H <sub>2</sub> O (1:1, v/v)                    | P                   | S                   | P                  | P  | PG       |
| DMSO : H <sub>2</sub> O (1:1, v/v)                           | P                   | P                   | P                  | I  | P        |
| 1,4-Dioxane : MeOH (1:1, v/v)                                | P                   | <b>G</b> (5 mg/mL)  | P                  | -  | PG       |
| 1,4-Dioxane : H <sub>2</sub> O (1:1, v/v) + Ag <sup>+</sup>  | P                   | P                   | <b>G</b> (8 mg/mL) | P  | P        |
| 1,4-Dioxane : H <sub>2</sub> O (1:1, v/v) + Cu <sup>2+</sup> | P                   | P                   | P                  | P  | P        |
| DMF + Ag <sup>+</sup>                                        | S                   | S                   | PG                 | S  | -        |
| DMF + Cu <sup>2+</sup>                                       | S                   | S                   | PG                 | S  | -        |
| DMF : H <sub>2</sub> O (1:1, v/v) + Ag <sup>+</sup>          | P                   | P                   | P                  | P  | -        |
| DMF : H <sub>2</sub> O (1:1, v/v) + Cu <sup>2+</sup>         | P                   | P                   | P                  | P  | -        |

S = solution; G = gel (mgc); I = insoluble; PS = partially soluble; P = Precipitation, PG = partial gel (thick material did not stick on the top of the vial upon turning). Gels were primarily identified by inversion of vials after 20-30 mins.

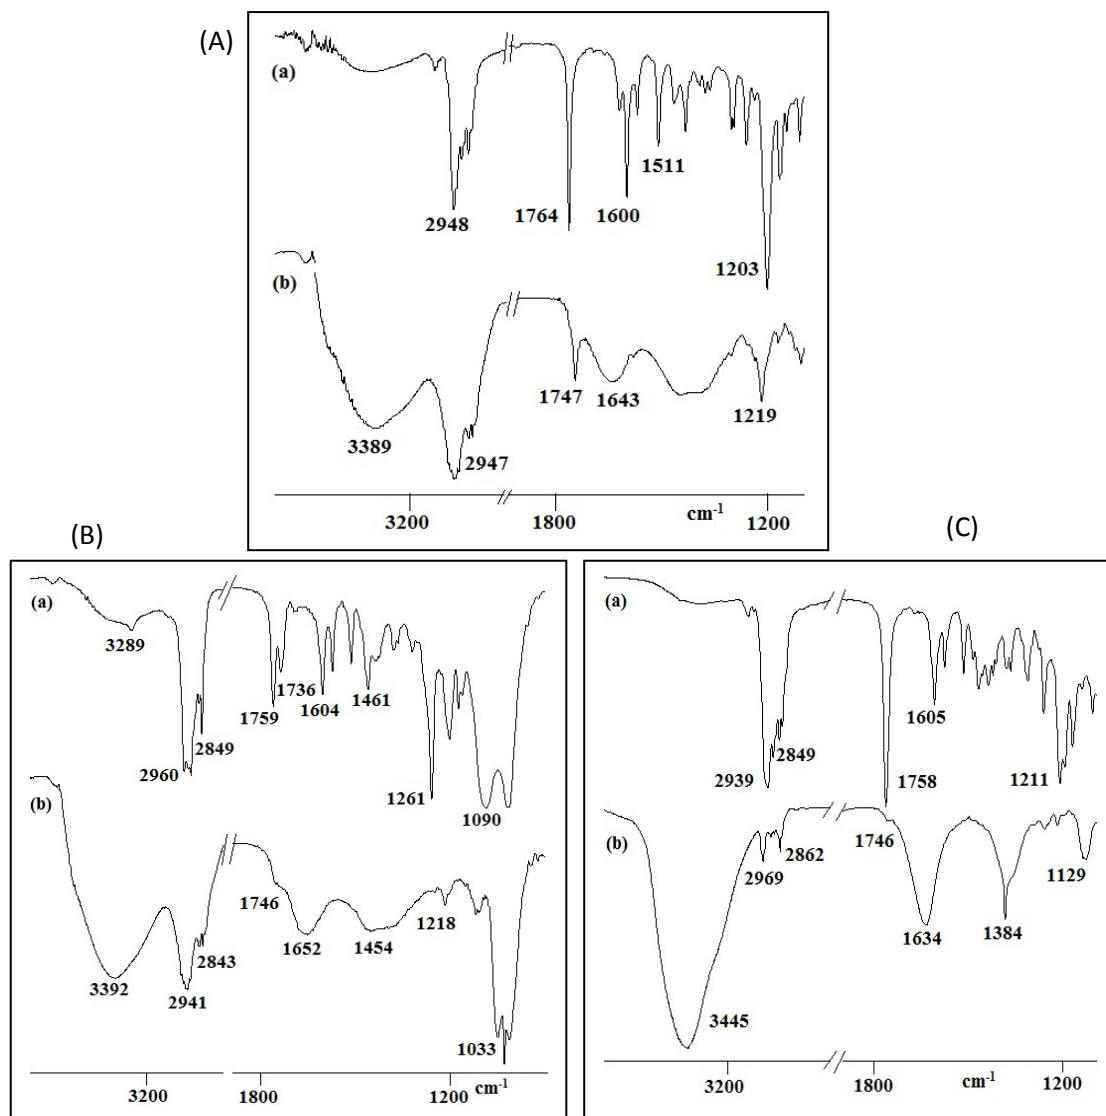

**Fig. S1.** Partial FTIR spectra of (A) **1**, (B) **2** and (C) **3** in (a) amorphous and (b) gel states [Gels were prepared from  $\text{CHCl}_3/\text{MeOH}$  (1:2, v/v) for **1** and 1,4-Dioxane/MeOH (1:1, v/v) for **2**. For **3** it was 1,4-Dioxane/ $\text{H}_2\text{O}$  (1:1, v/v) with equiv. amount of  $\text{Ag}^+$  ion].

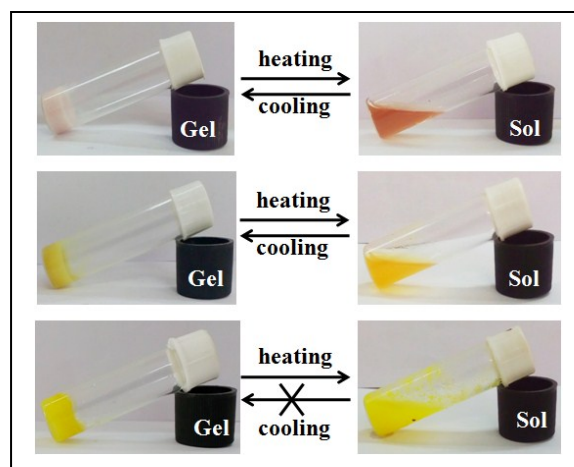

**Fig. S2.** Photographs showing the thermal responsiveness of the gel of **1** from  $\text{CHCl}_3/\text{MeOH}$  (1:2, v/v), **2** from 1,4-Dioxane/MeOH (1:1, v/v) and  $\text{Ag}^+$ -gel of **3** from 1,4-Dioxane/ $\text{H}_2\text{O}$  (1:1, v/v) (from top to bottom).

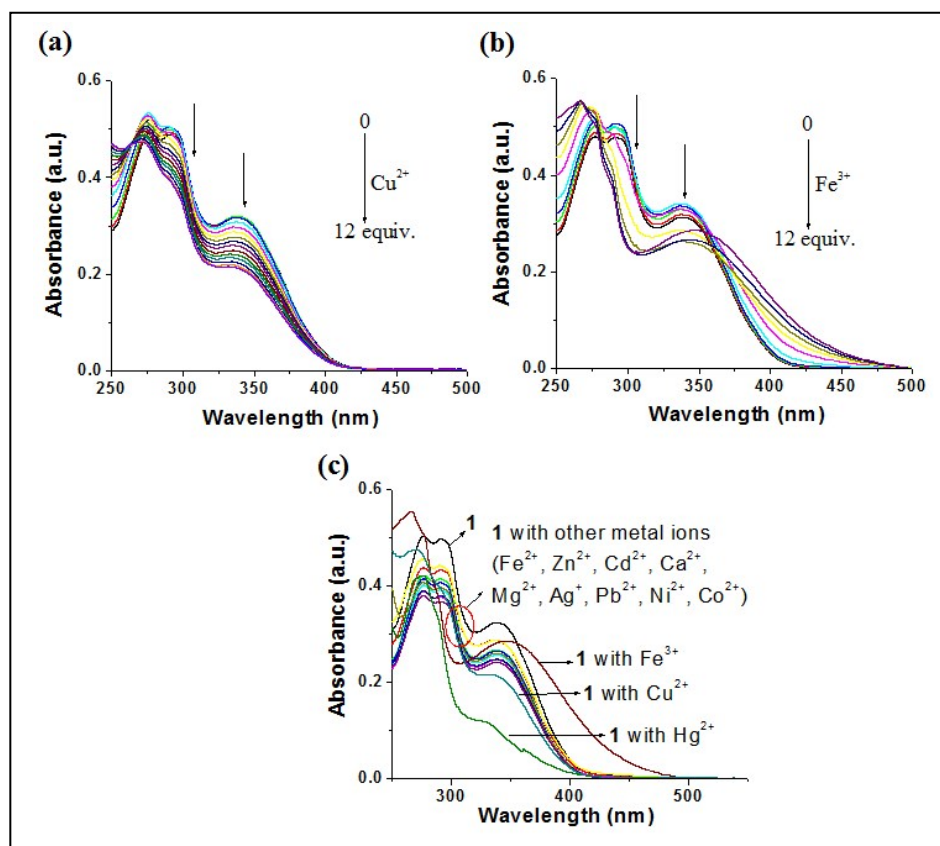

**Fig. S3.** Change in absorbance of **1** ( $c = 2.50 \times 10^{-5}$  M) upon addition of 12 equiv. amounts of (a)  $\text{Cu}^{2+}$ , (b)  $\text{Fe}^{3+}$  and (c) different metal ions ( $c = 1.0 \times 10^{-3}$  M) in  $\text{CHCl}_3/\text{CH}_3\text{OH}$  (1:2, v/v).

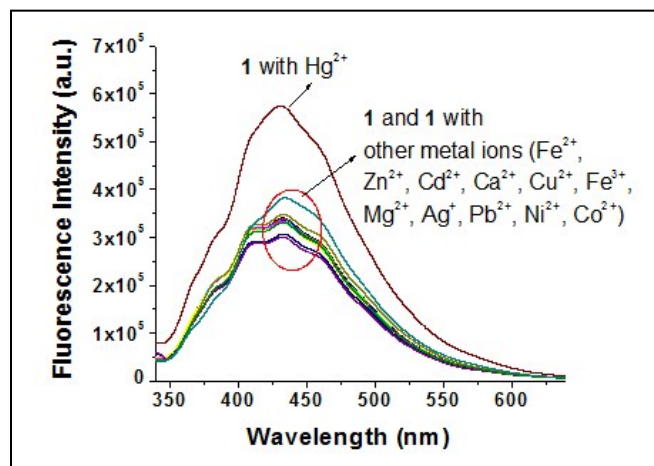

**Fig. S4.** Change in emission ( $\lambda_{\text{ex}} = 330 \text{ nm}$ ) of **1** ( $c = 2.50 \times 10^{-5} \text{ M}$ ) upon addition of 10 equiv. amounts of different metal ions ( $c = 1.0 \times 10^{-3} \text{ M}$ ) in  $\text{CHCl}_3/\text{CH}_3\text{OH}$  (1:2, v/v).

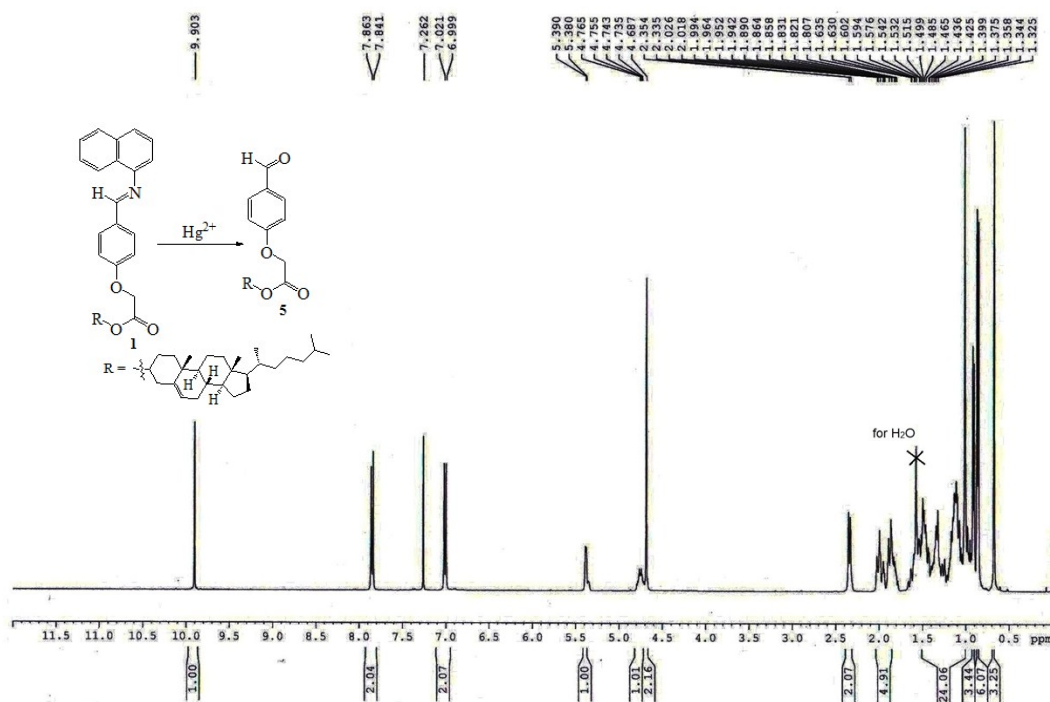

**Fig. S5.**  $^1\text{H}$  NMR spectra ( $\text{CDCl}_3$ , 400 MHz) of the isolated product (compound **5**) obtained from the reaction of **1** with  $\text{Hg}^{2+}$  ion.

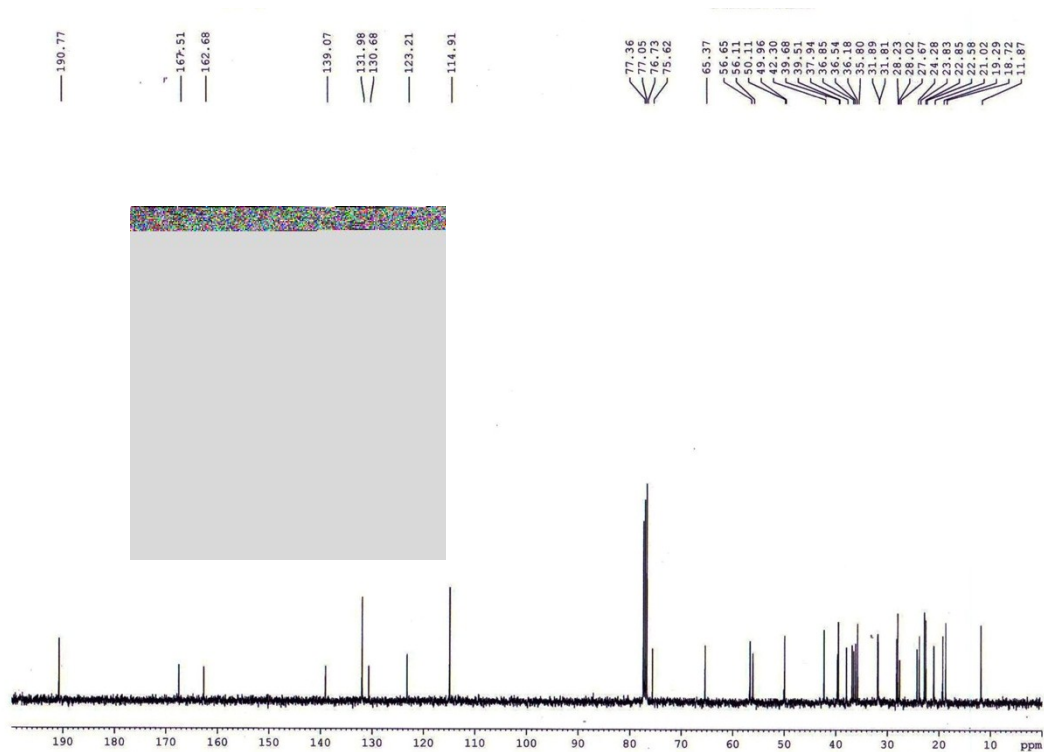

**Fig. S6.**  $^{13}\text{C}$  NMR spectra ( $\text{CDCl}_3$ , 100 MHz) of the isolated product (compound **5**) obtained from the reaction of **1** with  $\text{Hg}^{2+}$  ion.

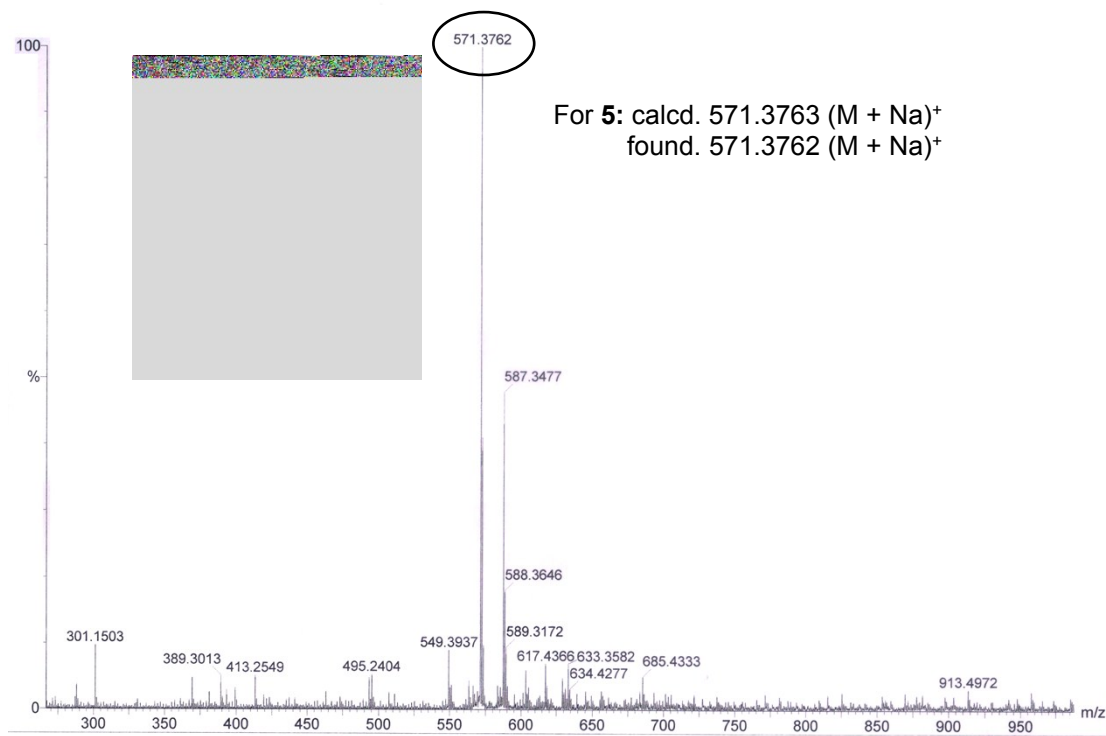

**Fig. S7.** HRMS spectra of the isolated product (compound **5**) obtained from the reaction of **1** with  $\text{Hg}^{2+}$  ion.



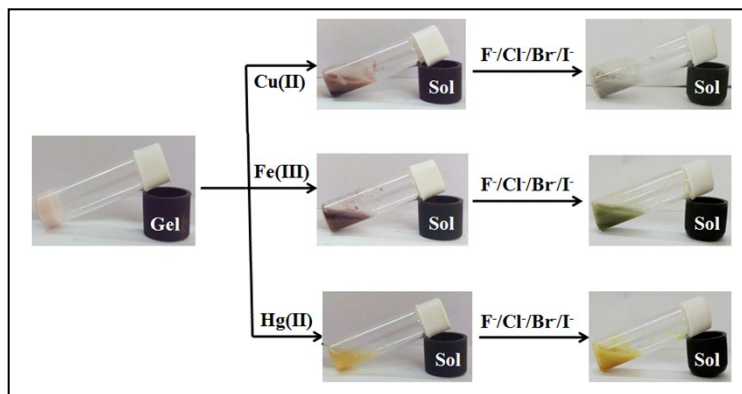

**Fig. S8.** Chemical responsiveness of the metal ion induced sols of **1** in presence of different halides.

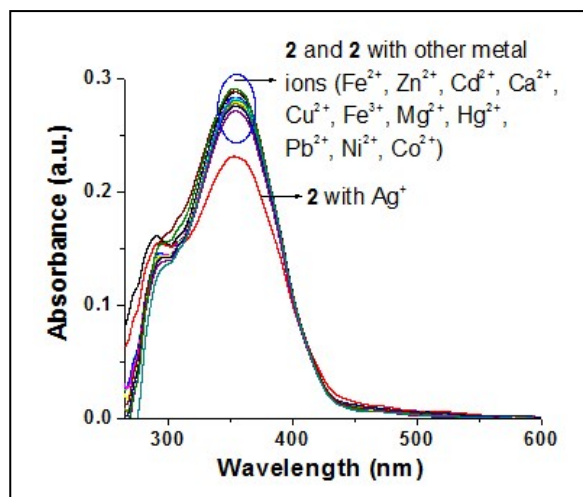

**Fig. S9.** Change in absorbance of **2** ( $c = 2.50 \times 10^{-5}$  M) upon addition of 2 equiv. amounts of different metal ions (as perchlorate salt,  $c = 1.0 \times 10^{-3}$  M) in 1,4-Dioxane/MeOH (1:1, v/v).

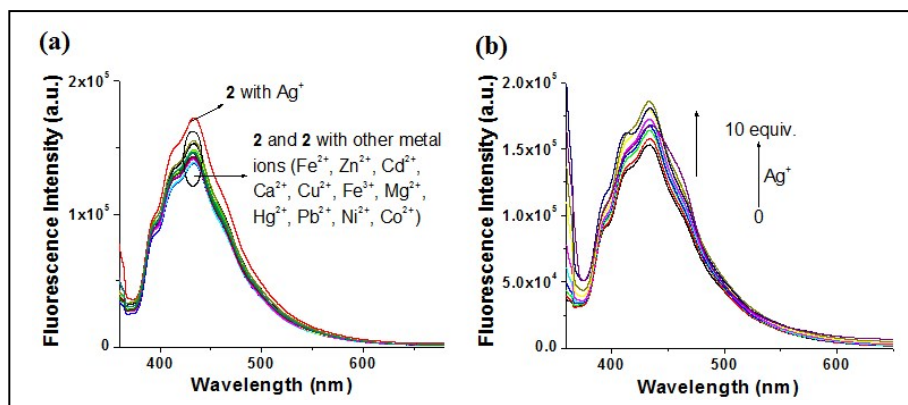

**Fig. S10.** Change in emission ( $\lambda_{\text{ex}} = 350$  nm) of **2** ( $c = 2.50 \times 10^{-5}$  M) upon addition of (a) 2 equiv. amounts of different metal ions and (b) 10 equiv. amounts of Ag<sup>+</sup> ions ( $c = 1.0 \times 10^{-3}$  M) in 1,4-Dioxane/MeOH (1:1, v/v).

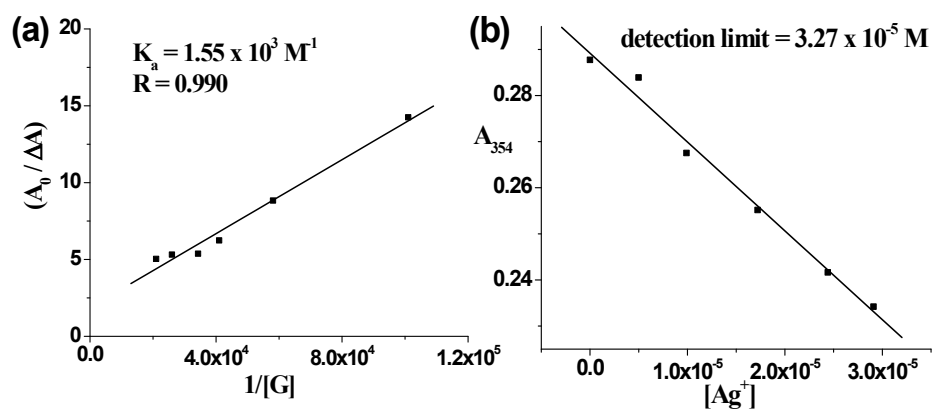

**Fig. S11.** (a) Benesi–Hilderband plot and (b) detection limit for **2** ( $c = 2.5 \times 10^{-5} \text{ M}$ ) with  $\text{Ag}^+$  ion ( $c = 1.0 \times 10^{-3} \text{ M}$ ) at 354 nm in 1,4-Dioxane/MeOH (1:1, v/v) from UV-vis titration.

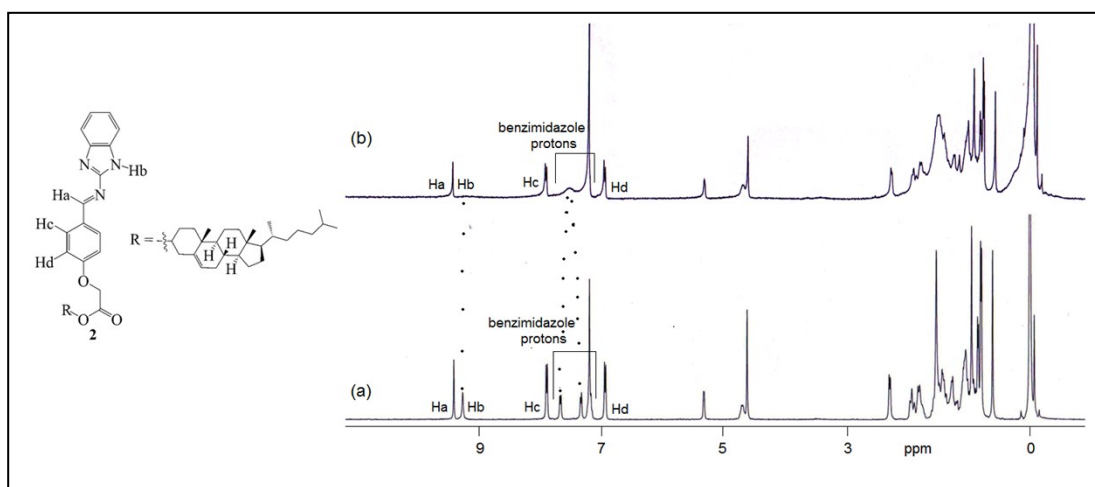

**Fig. S12.**  $^1\text{H}$  NMR spectra of (a) **2** and (b) **2** with  $\text{Ag}^+$  ion (1:1, after ~15 mins) in  $\text{CDCl}_3$ .

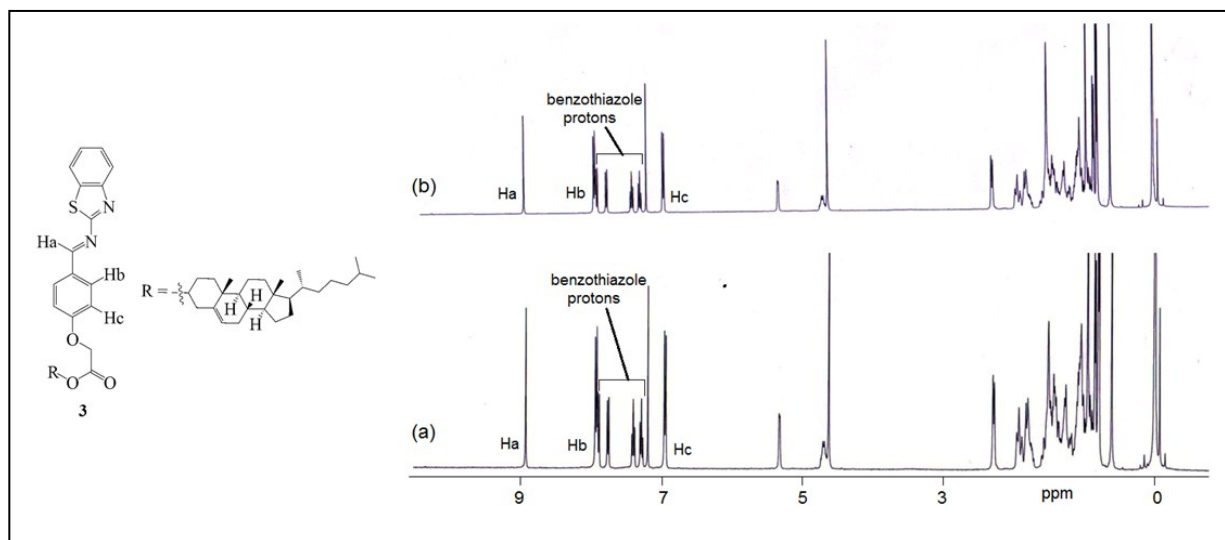

**Fig. S13.** Partial  $^1\text{H}$  NMR spectra of (a) **3** and (b) **3** with  $\text{Ag}^+$  ion (1:1, after  $\sim 15$  mins) in  $\text{CDCl}_3$ .

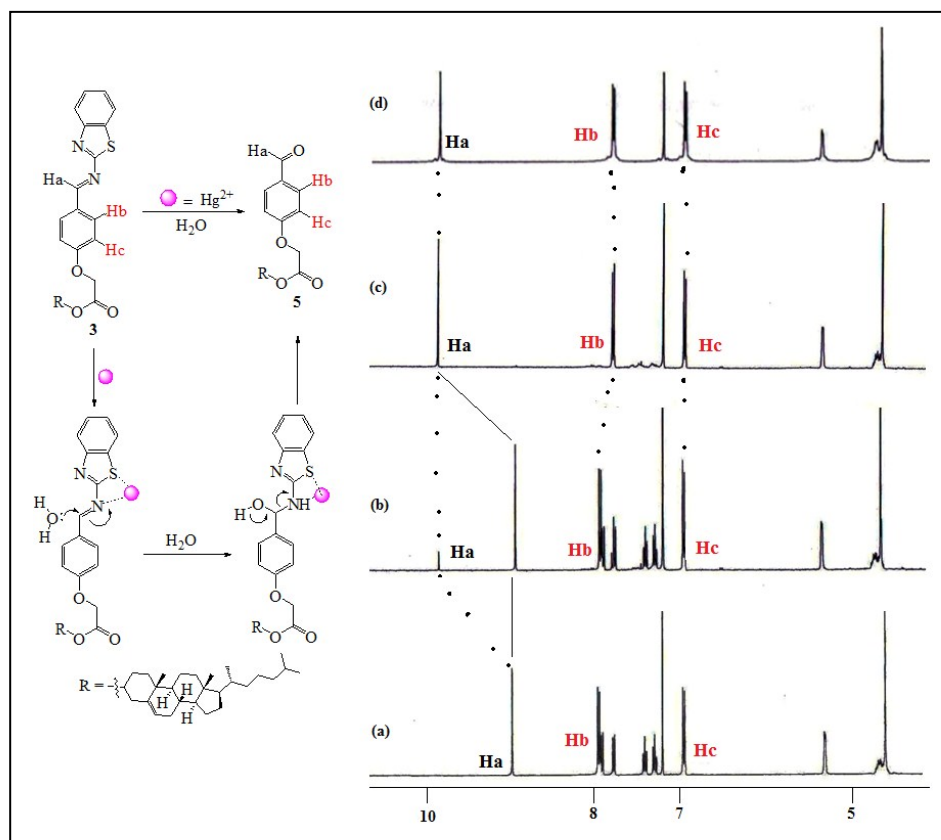

**Fig. S14.** Partial  $^1\text{H}$  NMR spectra of (a) **3**, (b) **3** with  $\text{Hg}^{2+}$  ion (1:1, after  $\sim 5$  min), (c) **3** with  $\text{Hg}^{2+}$  ion (1:1, after  $\sim 30$  min) and (d) **5** itself in  $\text{CDCl}_3$ .

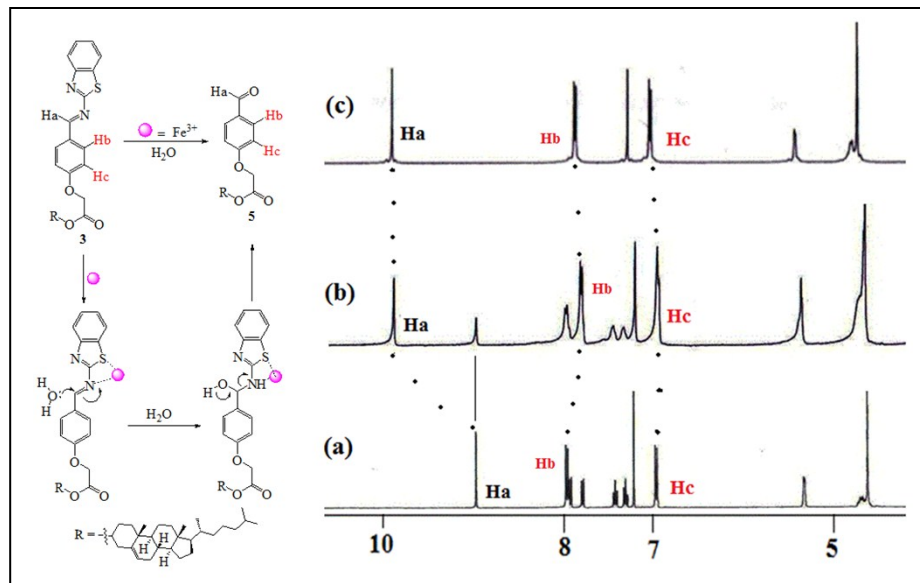

**Fig. S15.** Partial  $^1\text{H}$  NMR spectra of (a) **3**, (b) **3** with  $\text{Fe}^{3+}$  ion (1:1, after  $\sim 15$  min) and (c) **5** itself in  $\text{CDCl}_3$ .

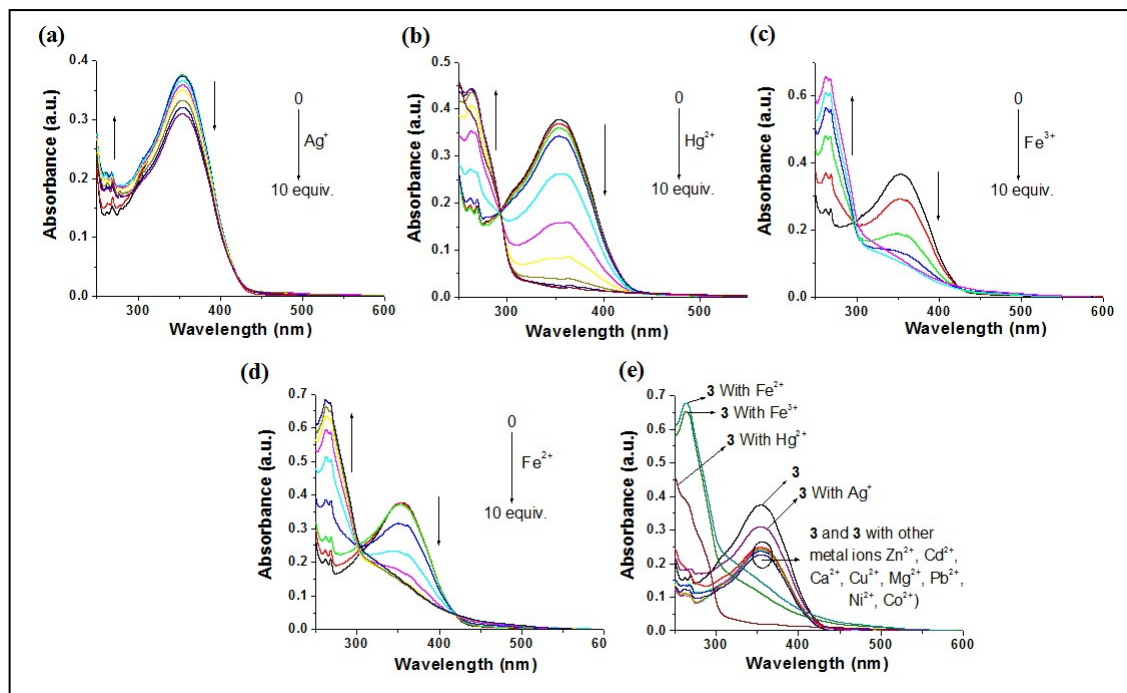

**Fig. S16.** Change in absorbance of **3** ( $c = 2.50 \times 10^{-5}$  M) upon addition of 10 equiv. amounts of (a)  $\text{Ag}^+$ , (b)  $\text{Hg}^{2+}$ , (c)  $\text{Fe}^{3+}$ , (d)  $\text{Fe}^{2+}$  and (e) different metal ions (as perchlorate salts,  $c = 1.0 \times 10^{-3}$  M) in 1,4-Dioxane/ $\text{H}_2\text{O}$  (2:1, v/v, to avoid precipitation or suspension 2:1 volume ratio was taken).

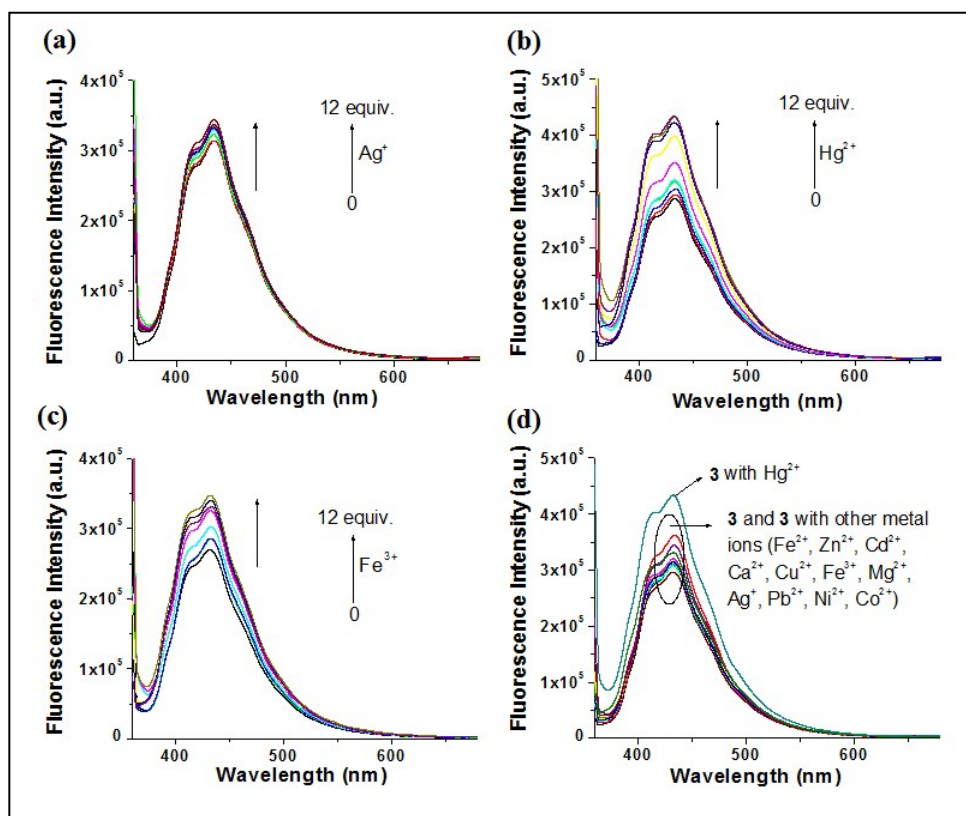

**Fig. S17.** Change in emission ( $\lambda_{\text{ex}} = 350 \text{ nm}$ ) of **3** ( $c = 2.50 \times 10^{-5} \text{ M}$ ) upon addition of 12 equiv. amounts of (a)  $\text{Ag}^+$ , (b)  $\text{Hg}^{2+}$ , (c)  $\text{Fe}^{3+}$  and (d) different metal ions ion (as perchlorate salts,  $c = 1.0 \times 10^{-3} \text{ M}$ ) in 1,4-Dioxane/ $\text{H}_2\text{O}$  (2:1, v/v, to avoid precipitation or suspension 2:1 volume ratio was taken).

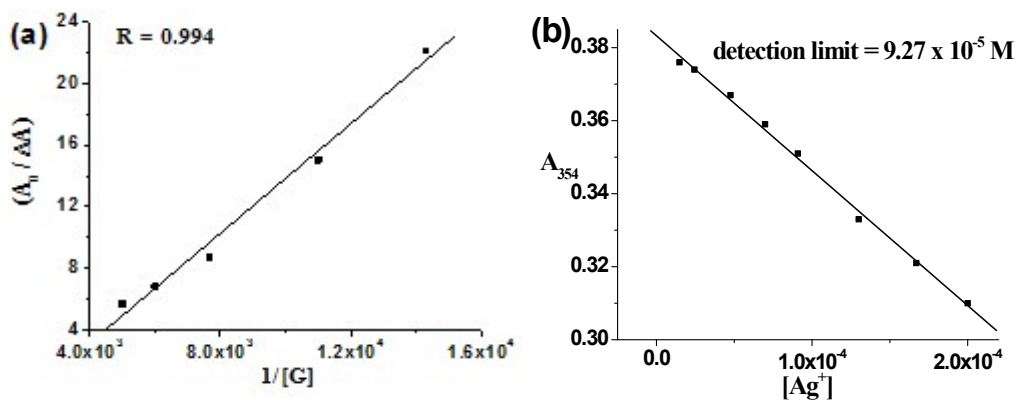

**Fig. S18.** (a) Benesi–Hilderband plot and (b) detection limit for **3** ( $c = 2.5 \times 10^{-5} \text{ M}$ ) with  $\text{Ag}^+$  ion ( $c = 1.0 \times 10^{-3} \text{ M}$ ) at 354 nm in 1,4-Dioxane/ $\text{H}_2\text{O}$  (2:1, v/v) from UV-vis titration.

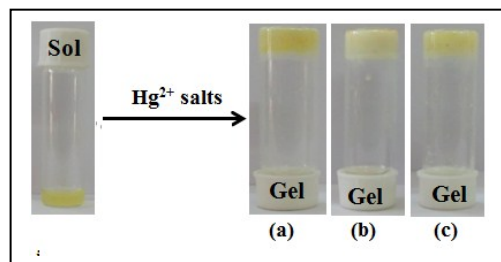

**Fig. S19.** Preparation of DMF-H<sub>2</sub>O gel of **4** in presence of different Hg-salts; (a) Hg(NO<sub>3</sub>)<sub>2</sub>, (b) Hg(ClO<sub>4</sub>)<sub>2</sub> and (c) HgCl<sub>2</sub>.

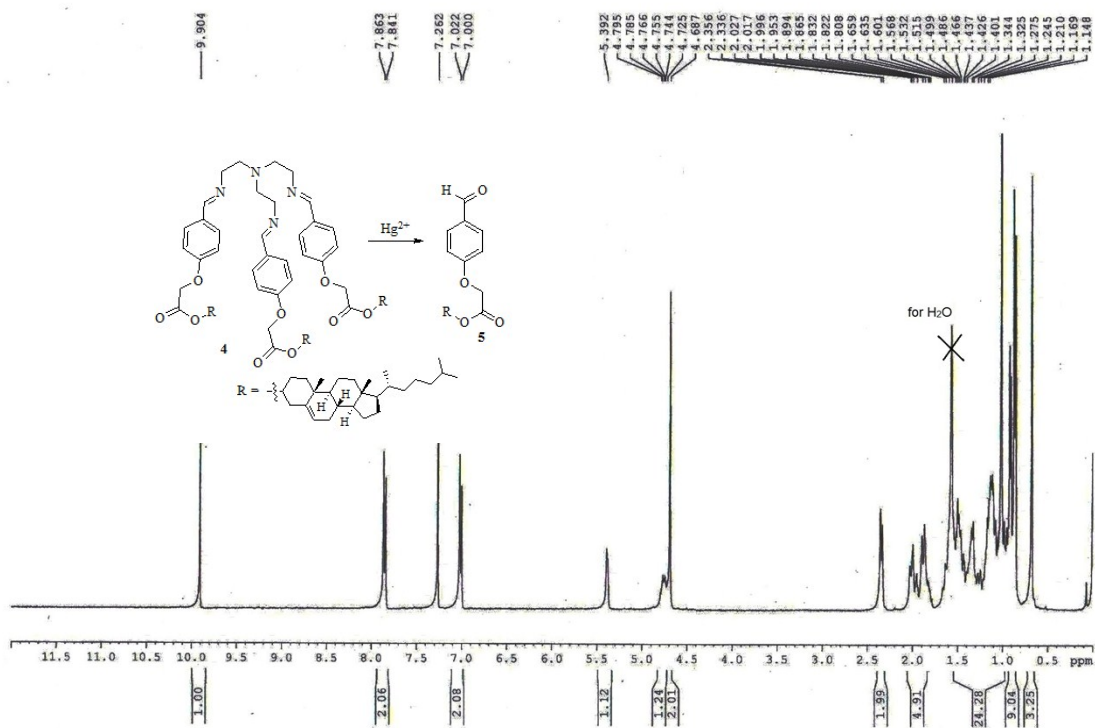

**Fig. S20.** <sup>1</sup>H NMR spectra (CDCl<sub>3</sub>, 400 MHz) of the isolated product (compound **5**) obtained from the reaction of **4** with Hg<sup>2+</sup> ion.

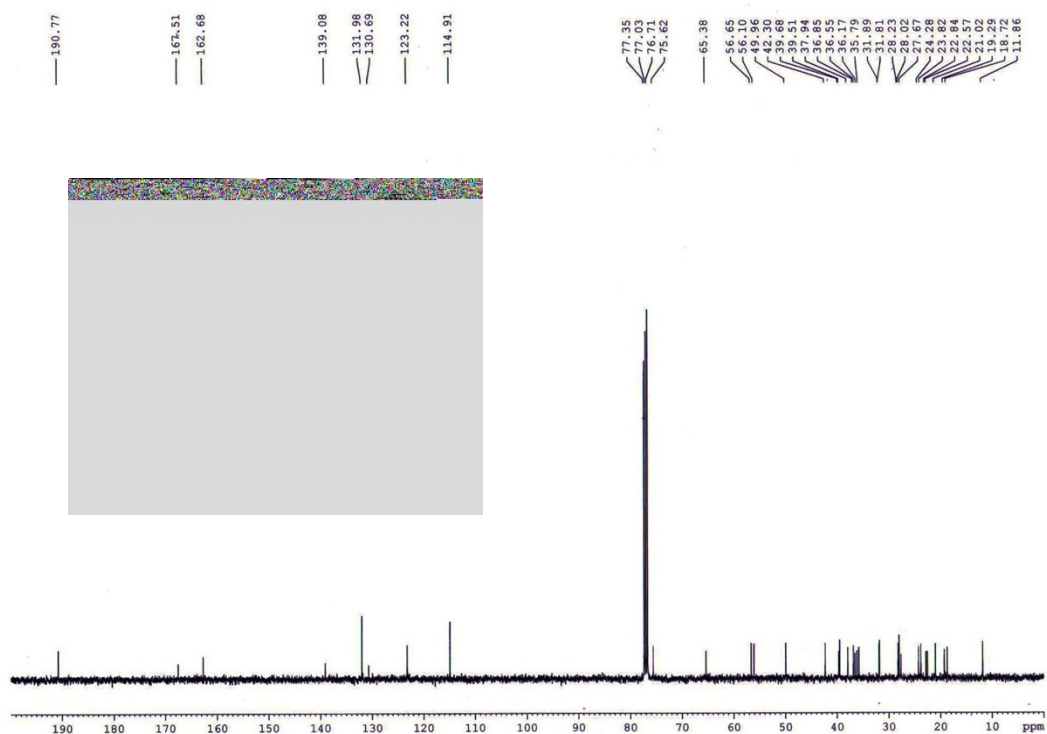

**Fig. S21.**  $^{13}\text{C}$  NMR spectra ( $\text{CDCl}_3$ , 100 MHz) of the isolated product (compound **5**) obtained from the reaction of **4** with  $\text{Hg}^{2+}$  ion.

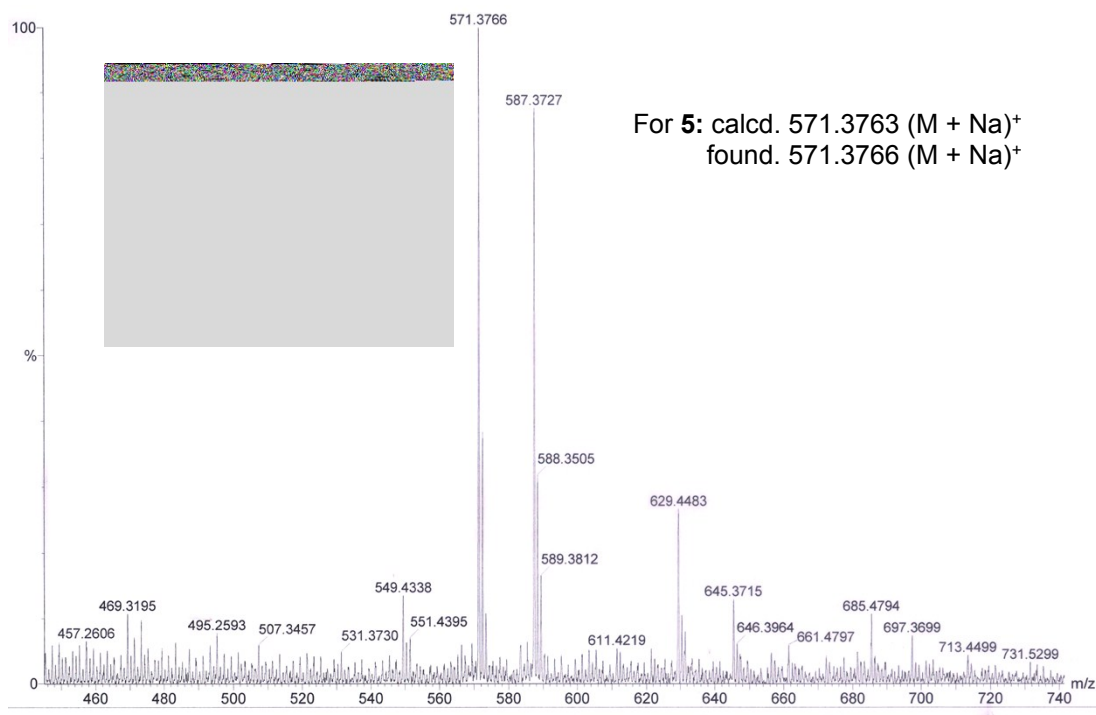

**Fig. S22.** HRMS spectra of the isolated product (compound **5**) obtained from the reaction of **4** with  $\text{Hg}^{2+}$  ion.

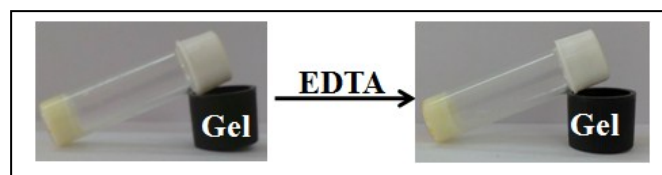

**Fig. S23.** Responsiveness of the Hg-gel of **4** in presence of EDTA.

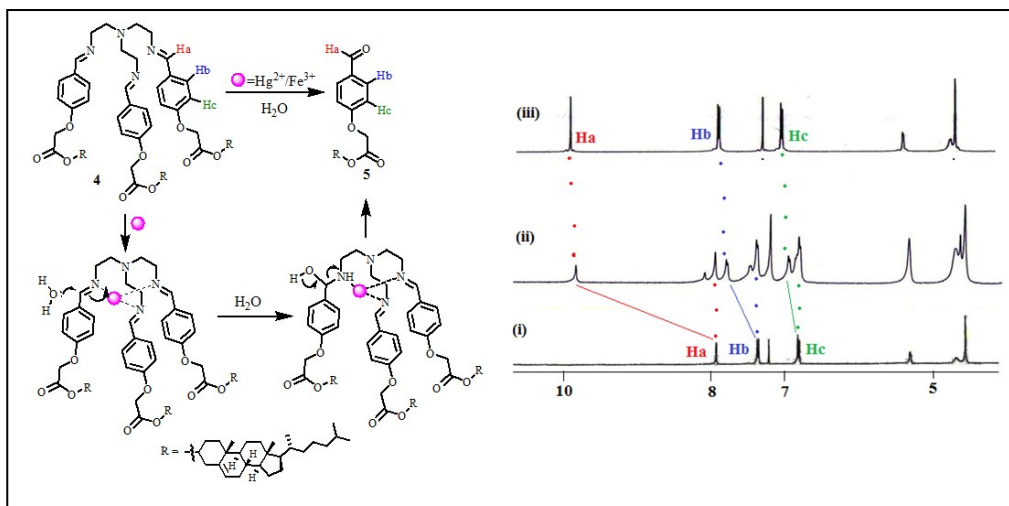

**Fig. S24.** Partial  $^1\text{H}$  NMR spectra of (i) **4**, (ii) **4** with  $\text{Fe}^{3+}$  ion (1:1, after  $\sim 15$  min) and (iii) **5** itself in  $\text{CDCl}_3$ .

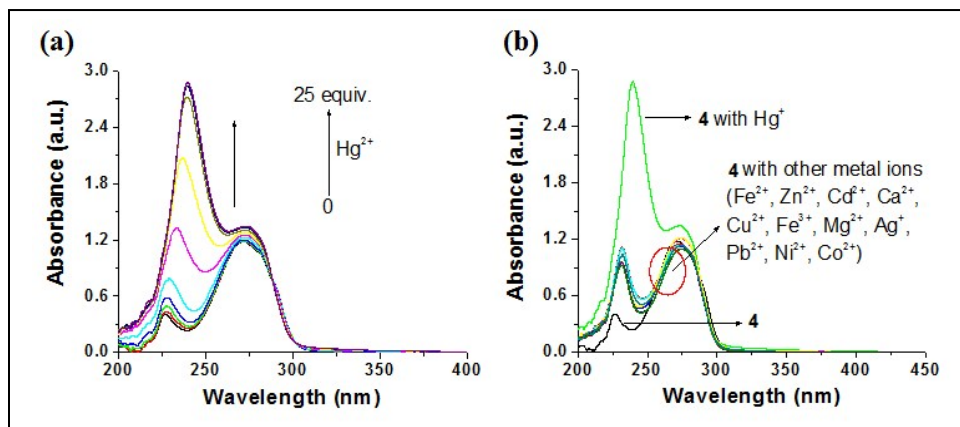

**Fig. S25.** Change in absorbance of **4** ( $c = 2.50 \times 10^{-5}$  M) upon addition of 25 equiv. amounts of (a)  $\text{Hg}^{2+}$  and (b) different metal ions (as perchlorate salts,  $c = 1.0 \times 10^{-3}$  M) in  $\text{DMF}/\text{H}_2\text{O}$  (1:1, v/v).



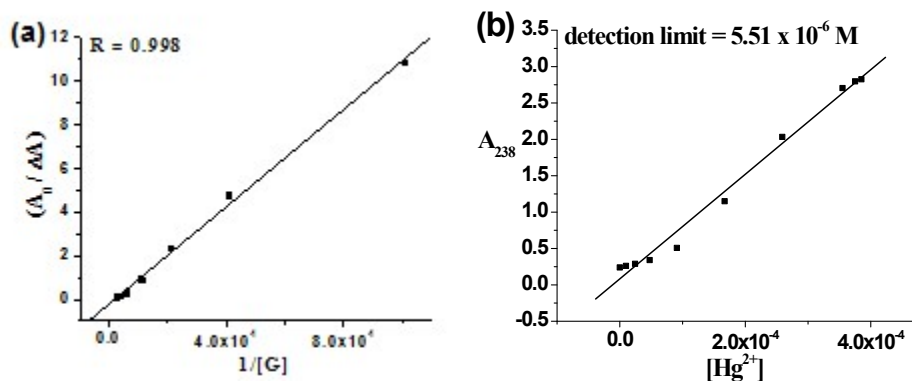

**Fig. S26.** (a) Benesi–Hilderband plot and (b) detection limit for **4** ( $c = 2.5 \times 10^{-5} \text{ M}$ ) with  $\text{Hg}^{2+}$  ion ( $c = 1.0 \times 10^{-3} \text{ M}$ ) at 238 nm in DMF/ $\text{H}_2\text{O}$  (1:1, v/v) from UV-vis titration.

**Table S4.** Binding constants and detection limit values for the metal ligand complexes.

| Metal ligand complex        | Binding constant values ( $\text{M}^{-1}$ ) |  |
|-----------------------------|---------------------------------------------|--|
|                             | From UV-vis titration                       |  |
| <b>2</b> – $\text{Ag}^+$    | $K = 1.55 \times 10^3$                      |  |
| <b>3</b> – $\text{Ag}^+$    | $K = 2.23 \times 10^3$                      |  |
| Metal ligand complex        | Detection limit values ( $\text{M}$ )       |  |
|                             | From UV-vis titration                       |  |
| <b>2</b> – $\text{Ag}^+$    | $3.27 \times 10^{-5}$                       |  |
| <b>3</b> – $\text{Ag}^+$    | $9.27 \times 10^{-5}$                       |  |
| <b>4</b> – $\text{Hg}^{2+}$ | $5.51 \times 10^{-6}$                       |  |

**Table S5:** Chemodosimeters based on Hg<sup>2+</sup> ion-induced imine bond hydrolysis mechanism

| Structure                                                                           | Solvent                                                             | Sensing mechanism                                 | Interfering metal ions                                                                                     | Detection limit for Hg <sup>2+</sup> (M) | Ref.                                            |
|-------------------------------------------------------------------------------------|---------------------------------------------------------------------|---------------------------------------------------|------------------------------------------------------------------------------------------------------------|------------------------------------------|-------------------------------------------------|
| 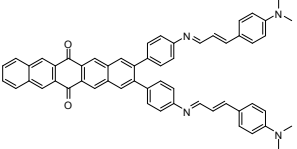   | THF-H <sub>2</sub> O (9.5 : 0.5, v : v) buffered with HEPES, pH = 7 | Fluorescence enhancement                          | -                                                                                                          | 2.8 x 10 <sup>-10</sup>                  | <i>Dalton Trans.</i> , 2013, <b>42</b> , 15063. |
|    | MeOH/H <sub>2</sub> O (9:1, v/v)                                    | Fluorescence enhancement                          | -                                                                                                          | 8 x 10 <sup>-10</sup>                    | <i>Inorg. Chem.</i> , 2014, <b>53</b> , 4944.   |
|   | CH <sub>3</sub> CN:H <sub>2</sub> O (9:1)                           | Fluorescence enhancement                          | -<br><br>Pb <sup>2+</sup> , Fe <sup>2+</sup><br><br>Pb <sup>2+</sup> , Fe <sup>2+</sup> , Fe <sup>3+</sup> | -<br><br>-<br><br>-                      | <i>Arkivoc</i> , 2010, <b>7</b> , 170.          |
|  | DMF : H <sub>2</sub> O = (1 : 1, v/v)                               | Sol to gel transition<br>Chemodosimetric approach | -                                                                                                          | 5.51 x 10 <sup>-6</sup>                  | <i>Present work</i>                             |

**<sup>1</sup>H NMR of 1 (CDCl<sub>3</sub>, 400 MHz)**

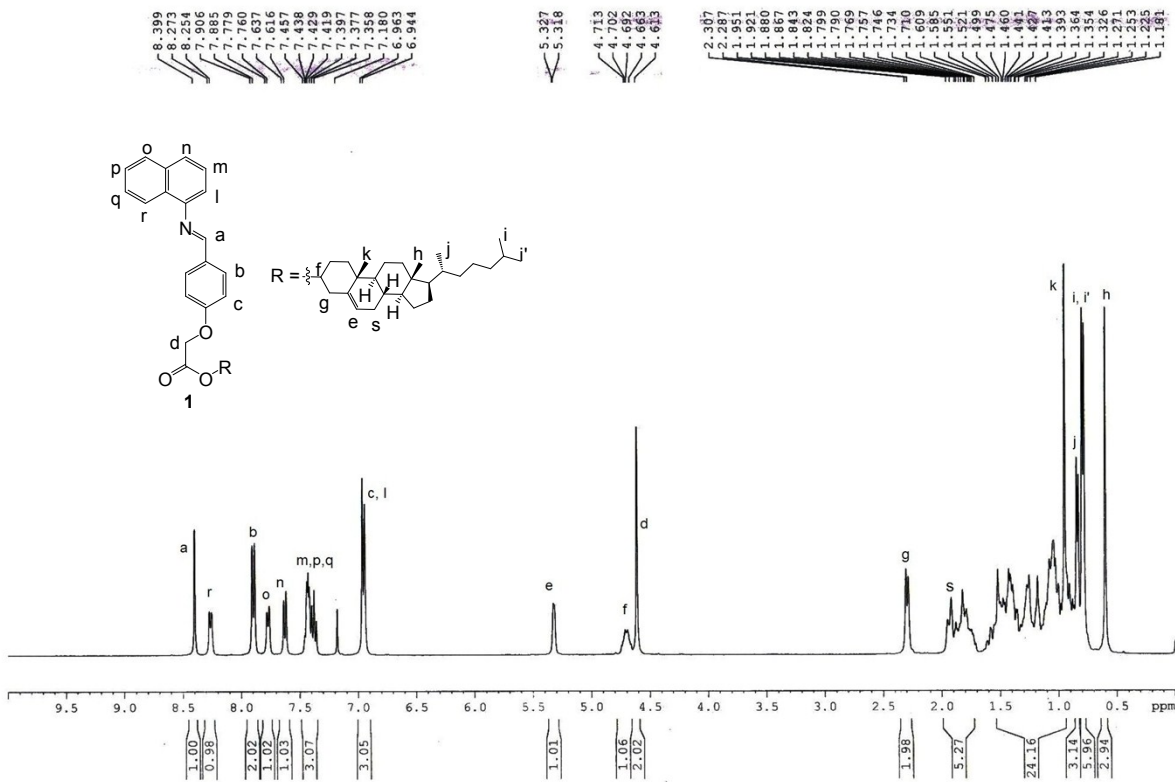

<sup>13</sup>C NMR of 1 (CDCl<sub>3</sub>, 100 MHz)

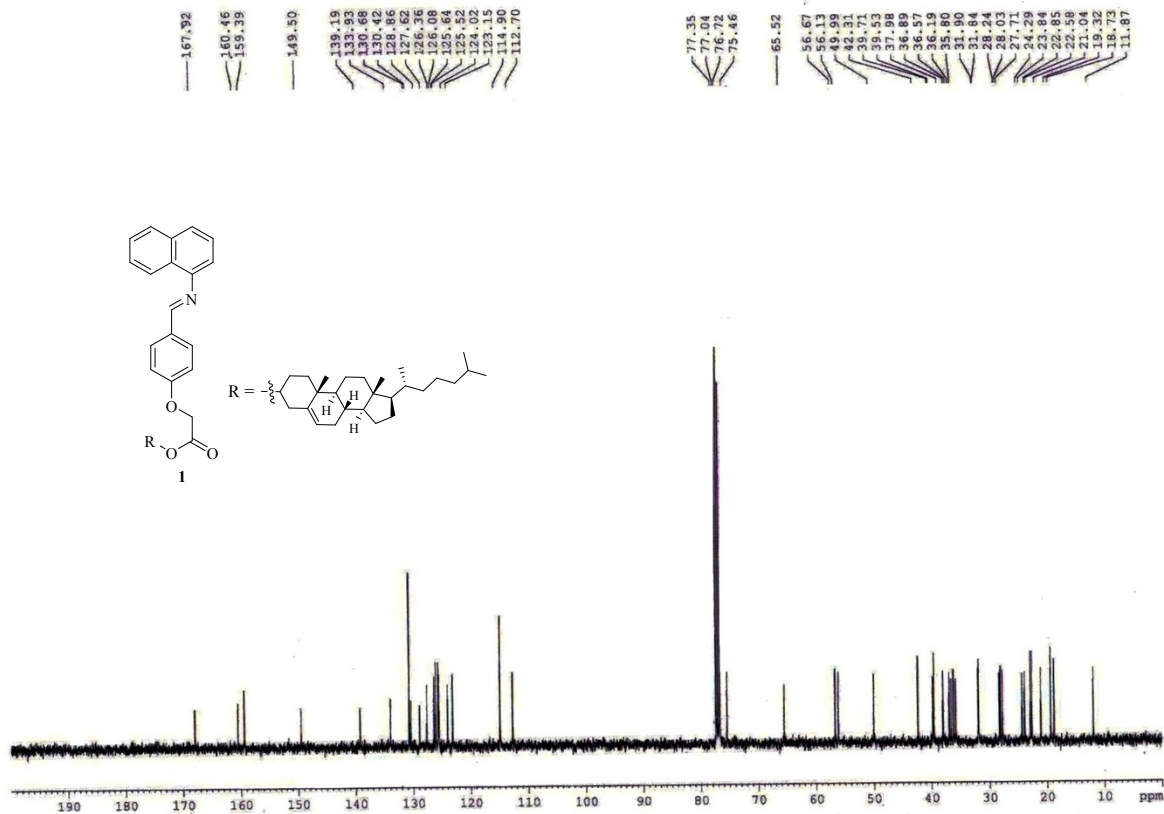

# Mass spectrum of 1.

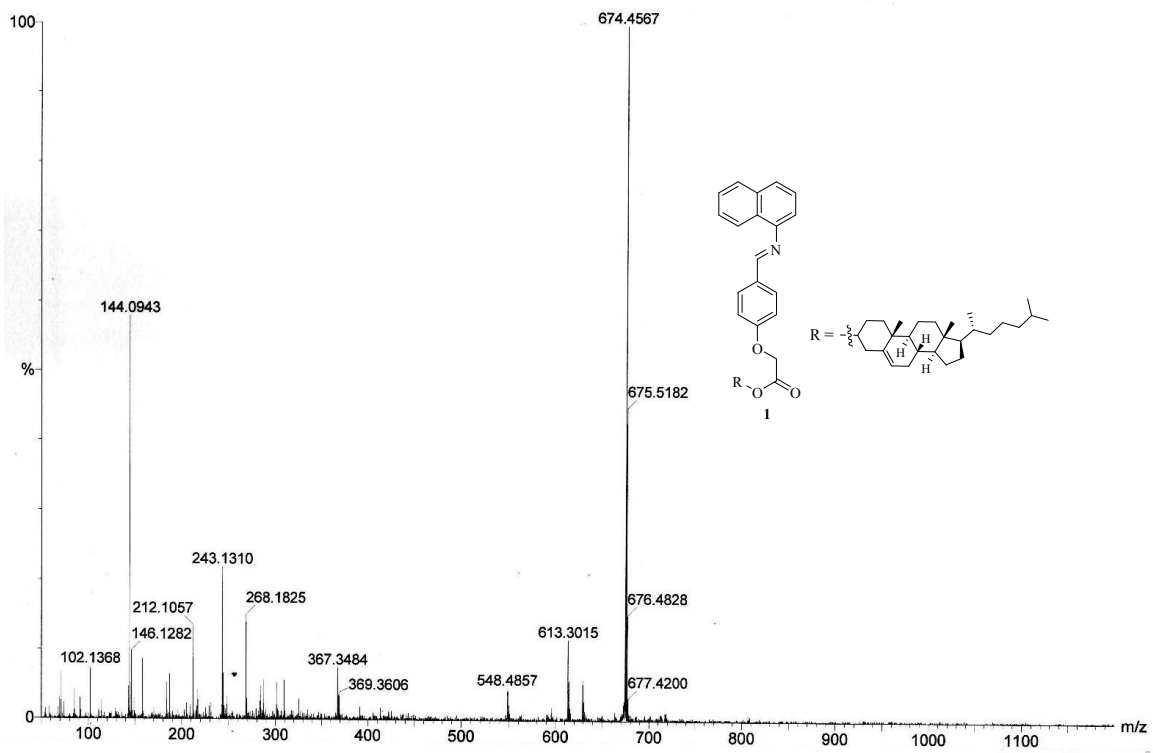

COSY spectrum of **1** (CDCl<sub>3</sub>, 500 MHz)

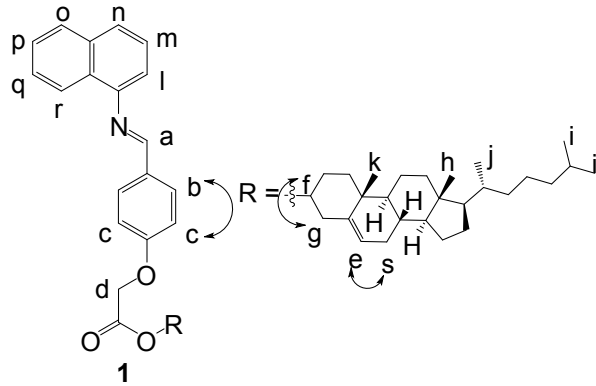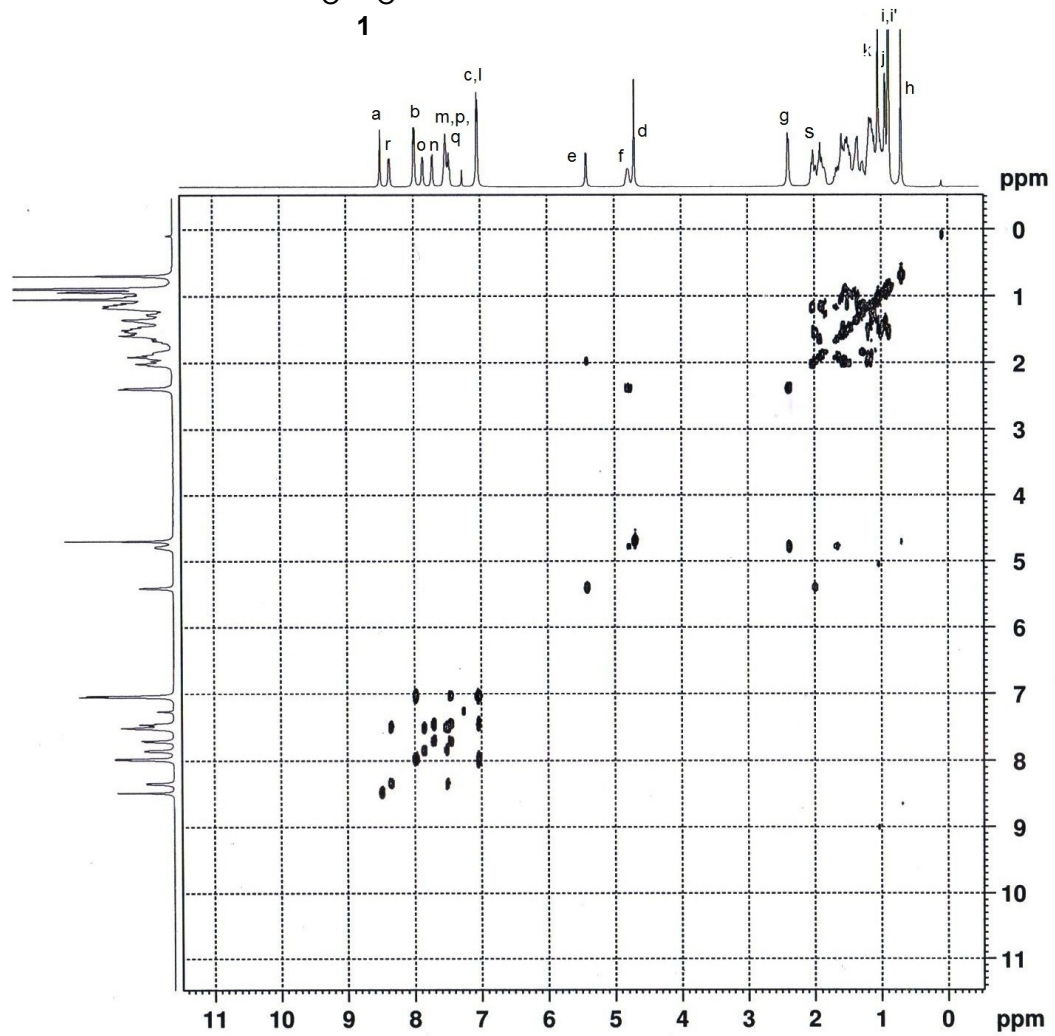

NOESY spectrum of 1 (CDCl<sub>3</sub>, 400 MHz)

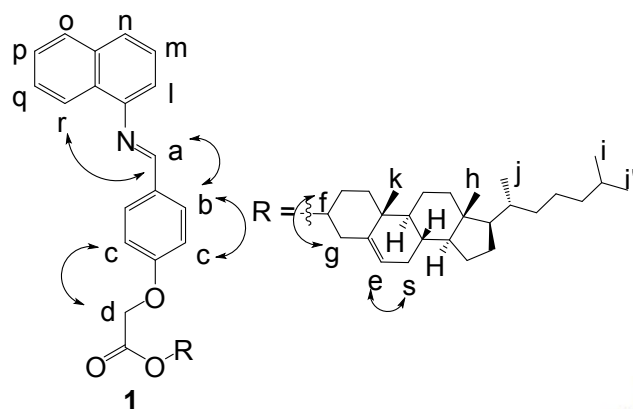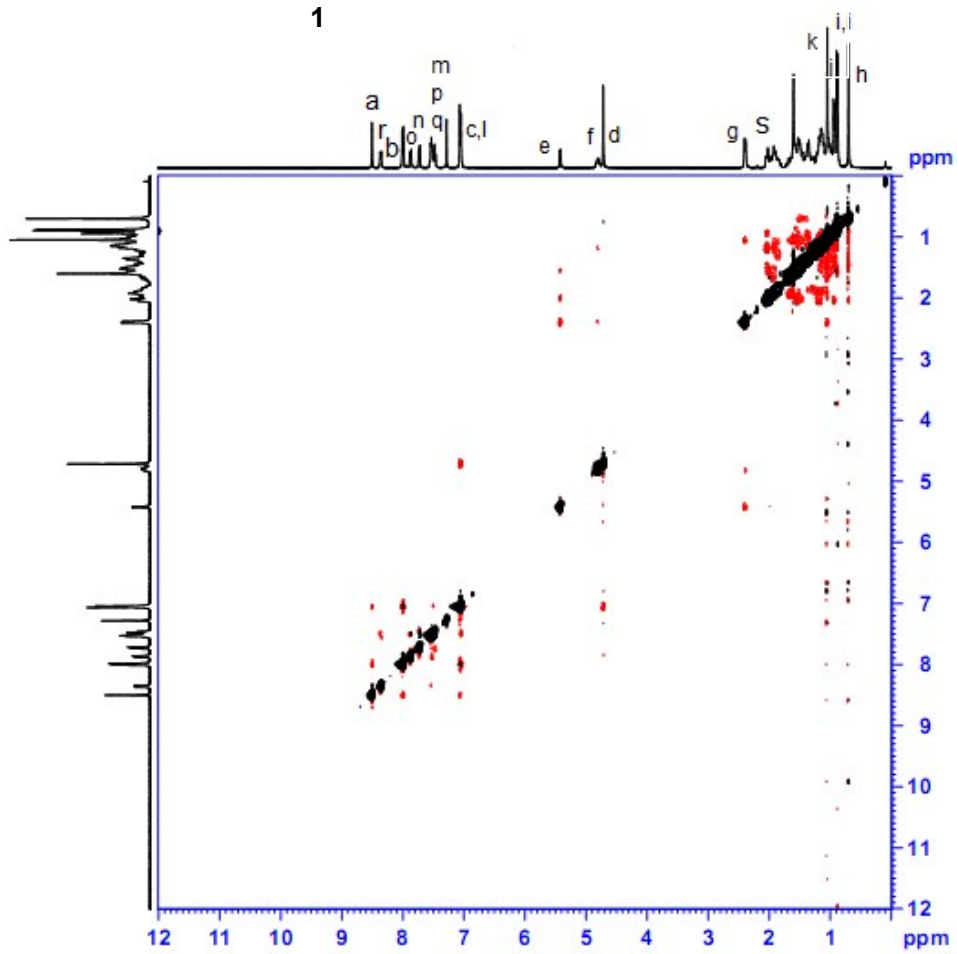





<sup>1</sup>H NMR of 2 (CDCl<sub>3</sub>, 400 MHz)

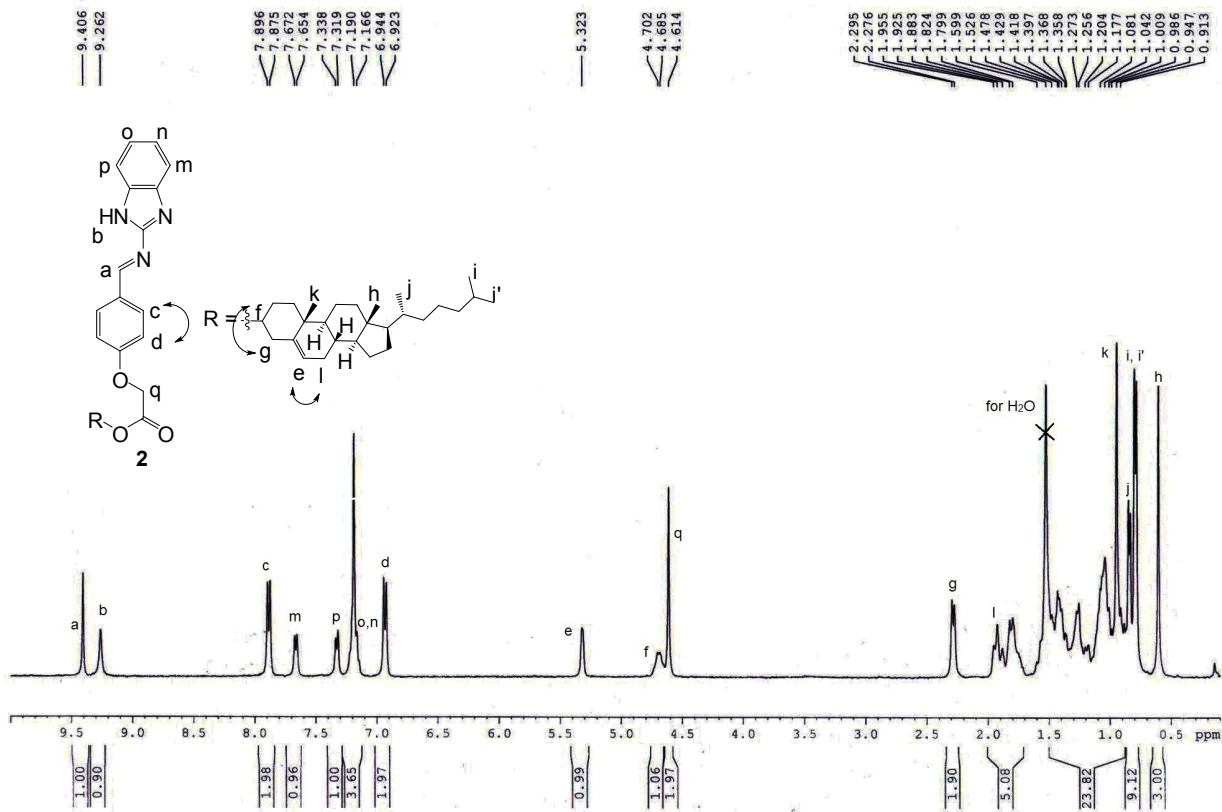

**$^{13}\text{C}$  NMR of 2 ( $\text{CDCl}_3$ , 100 MHz)**

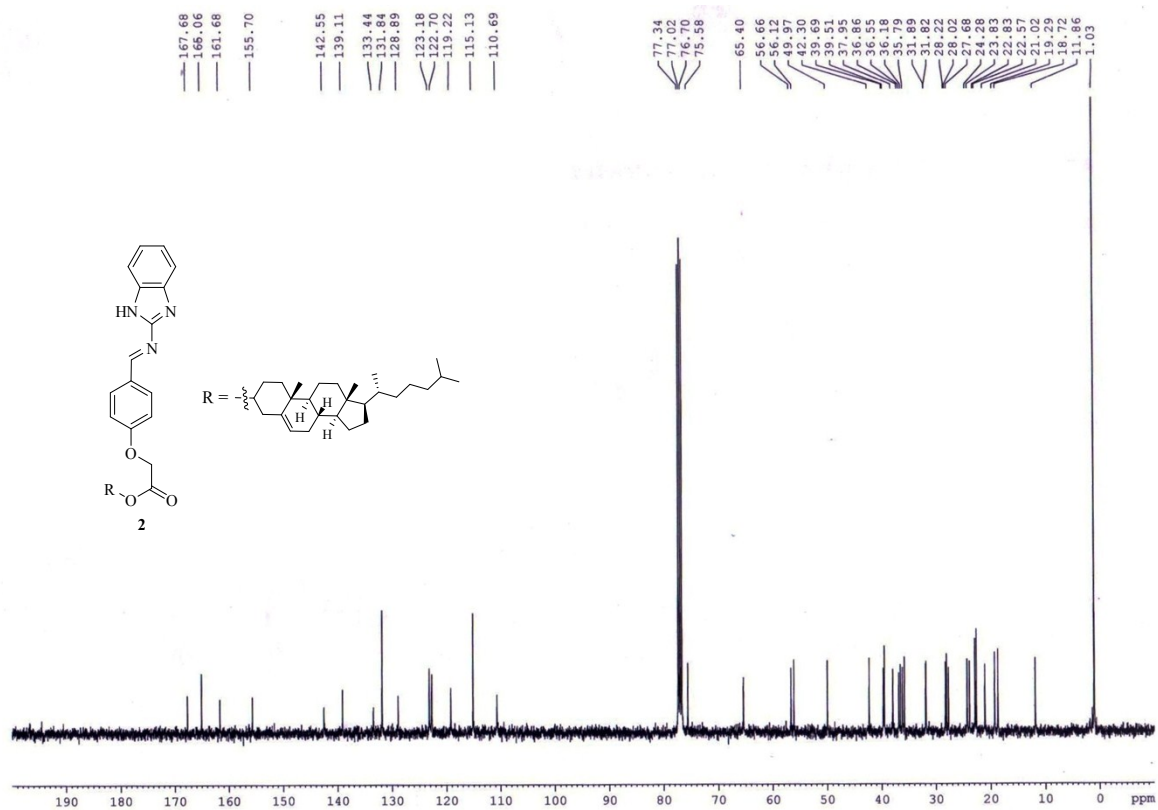

# Mass spectrum of 2.

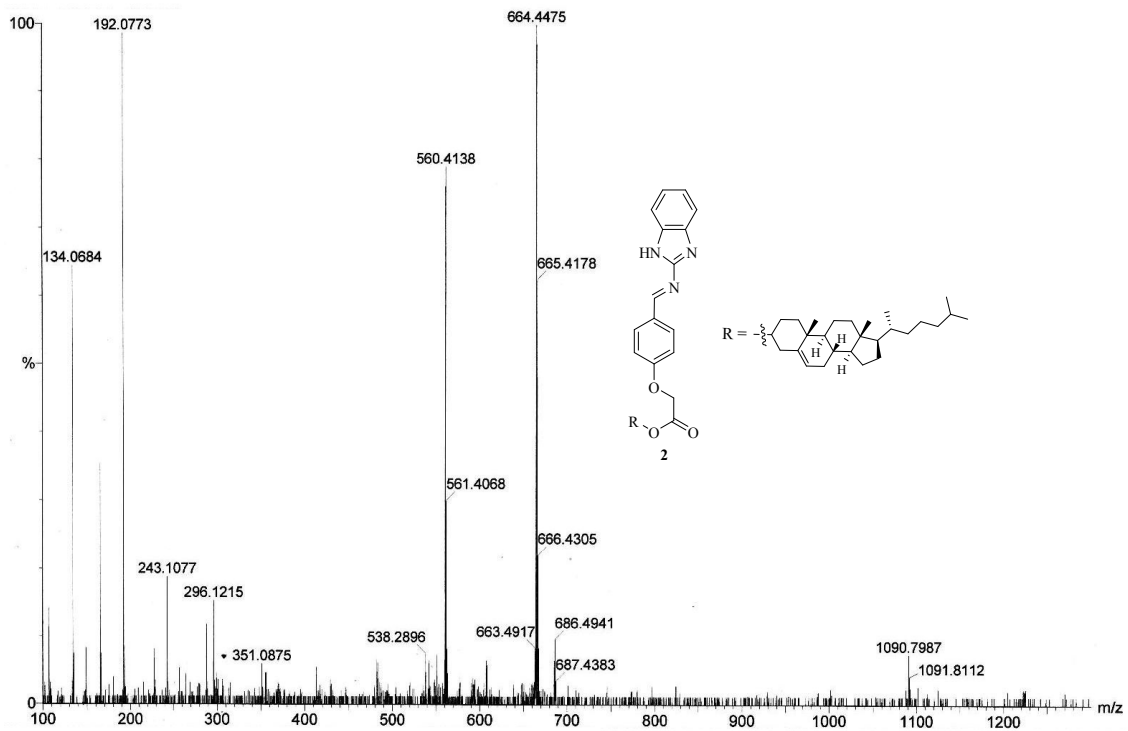

COSY spectrum of 2 (CDCl<sub>3</sub>, 500 MHz)

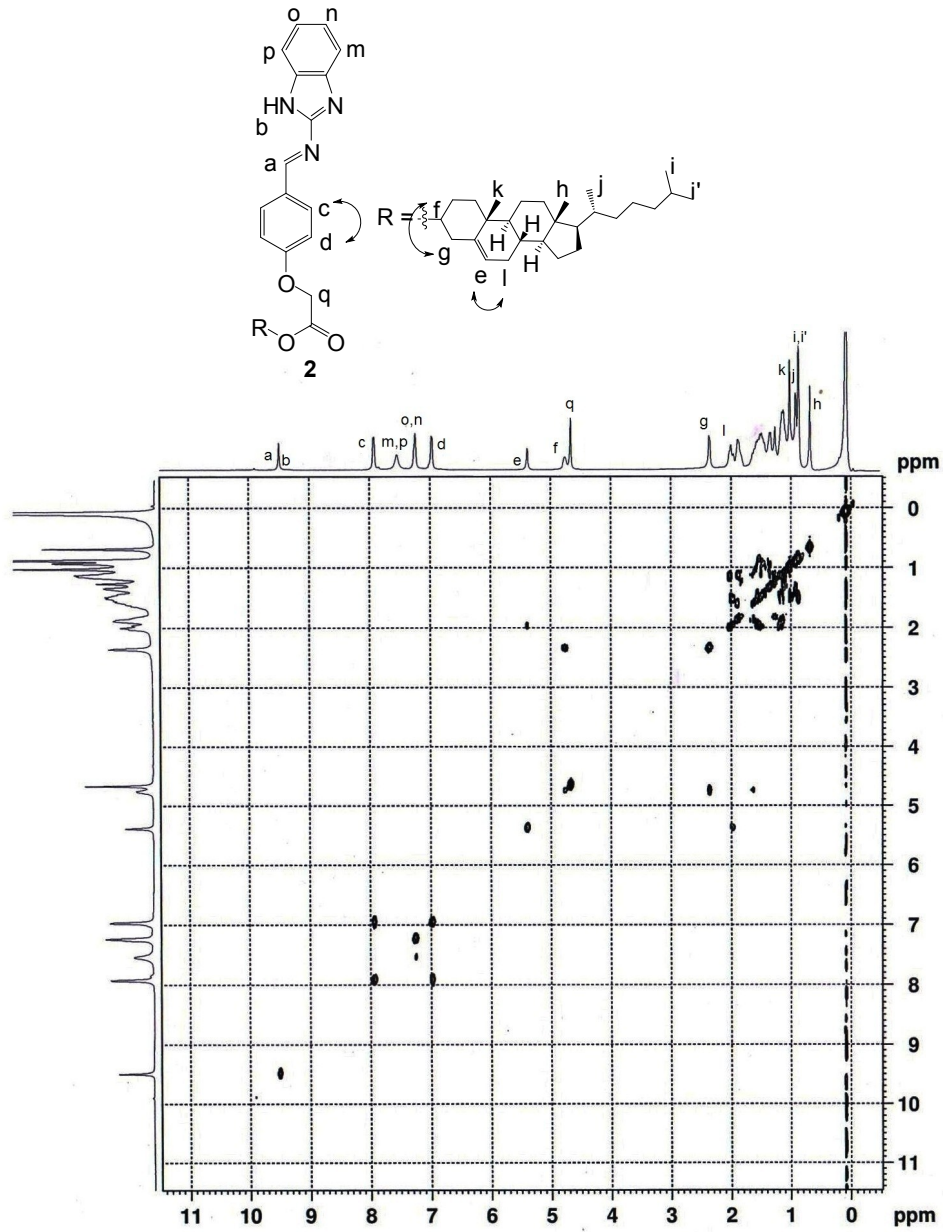

<sup>1</sup>H NMR of 3 (CDCl<sub>3</sub>, 400 MHz)

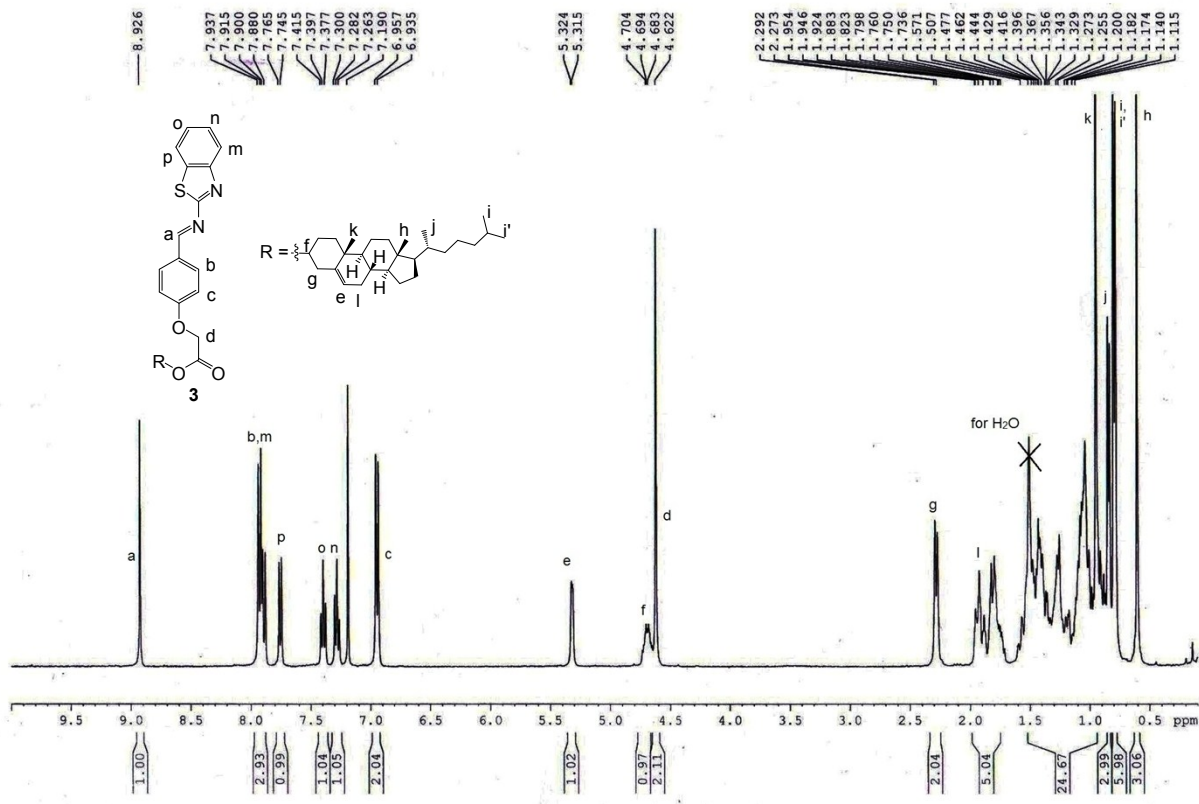

**$^{13}\text{C}$  NMR of 3 ( $\text{CDCl}_3$ , 100 MHz)**

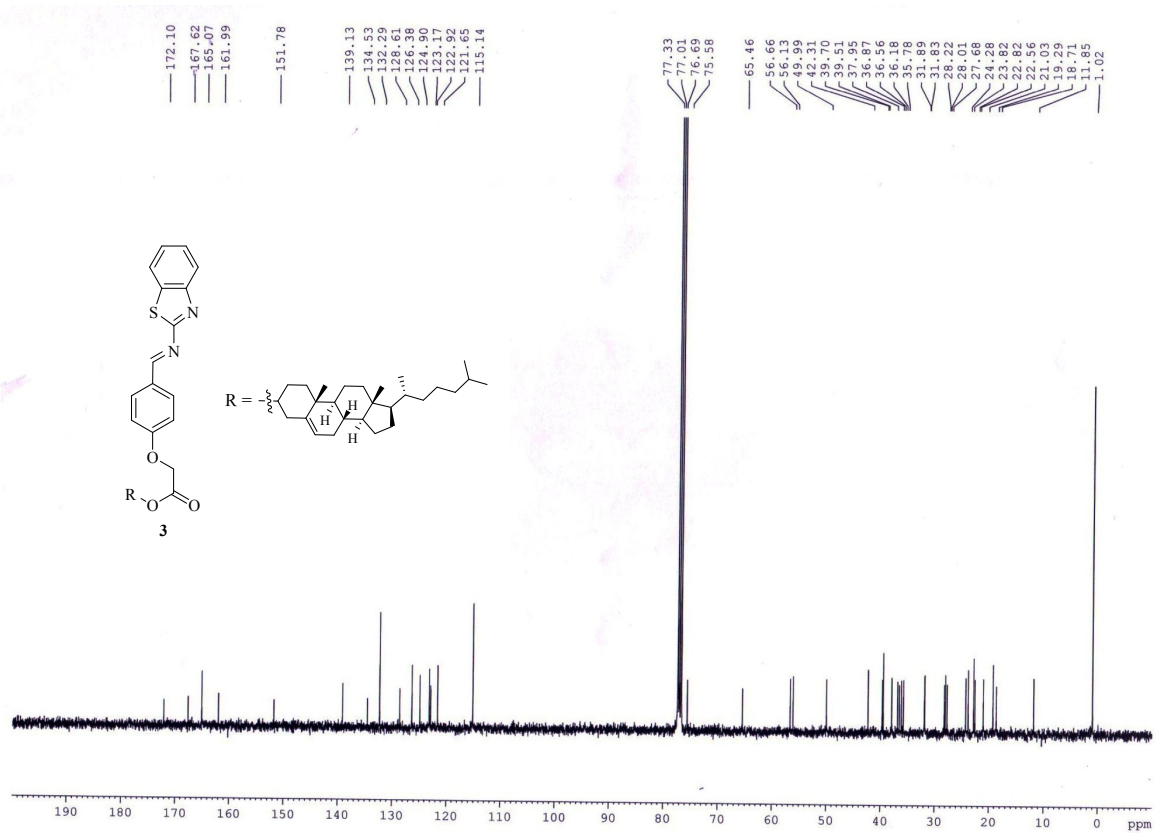

# Mass spectrum of 3.

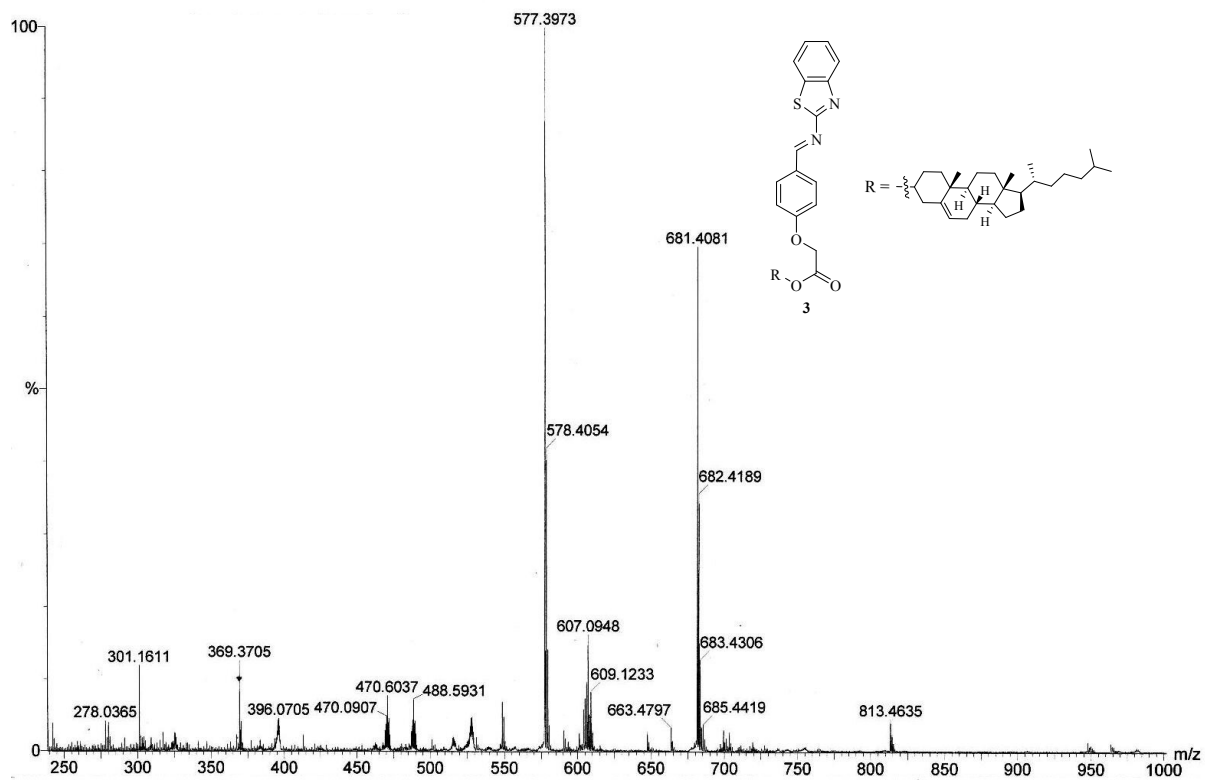





<sup>1</sup>H NMR of 4 (CDCl<sub>3</sub>, 400 MHz)

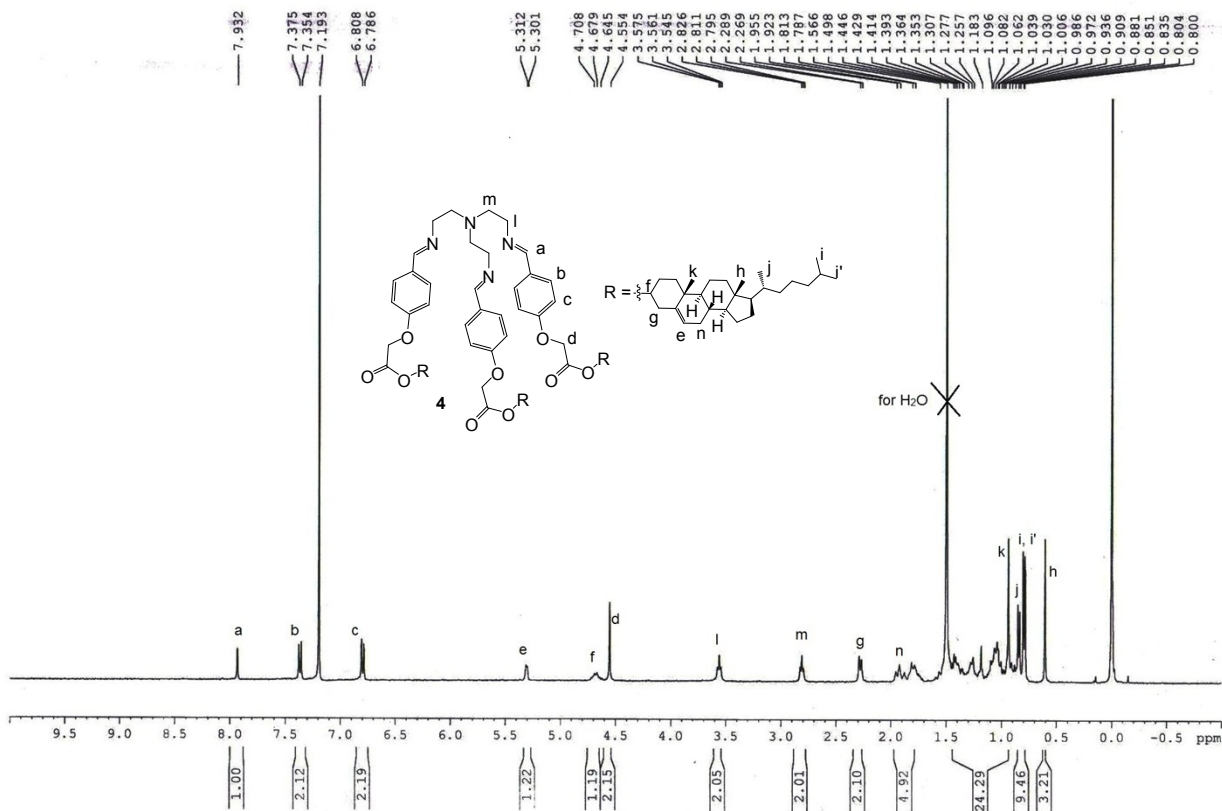

**<sup>13</sup>C NMR of 4 (CDCl<sub>3</sub>, 100 MHz)**

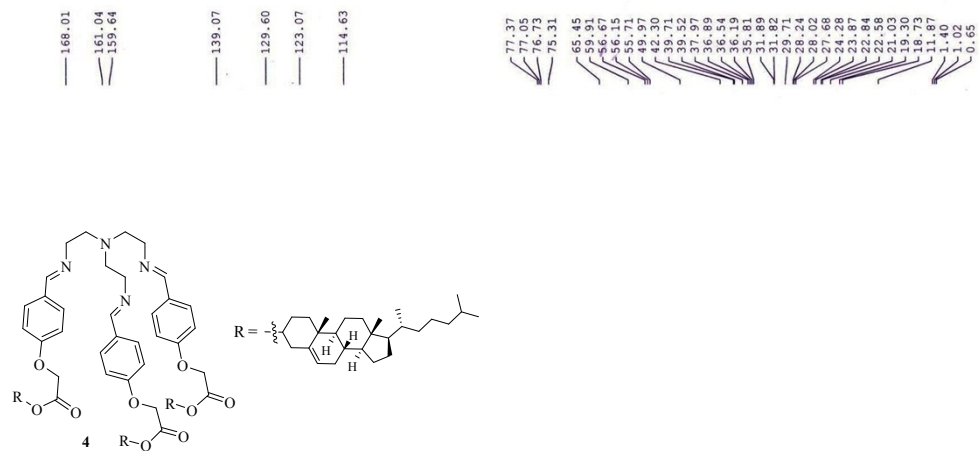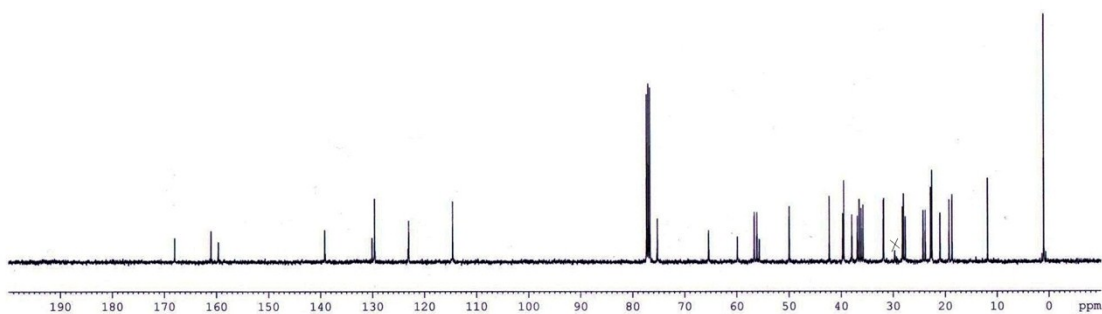

# Mass spectrum of 4.

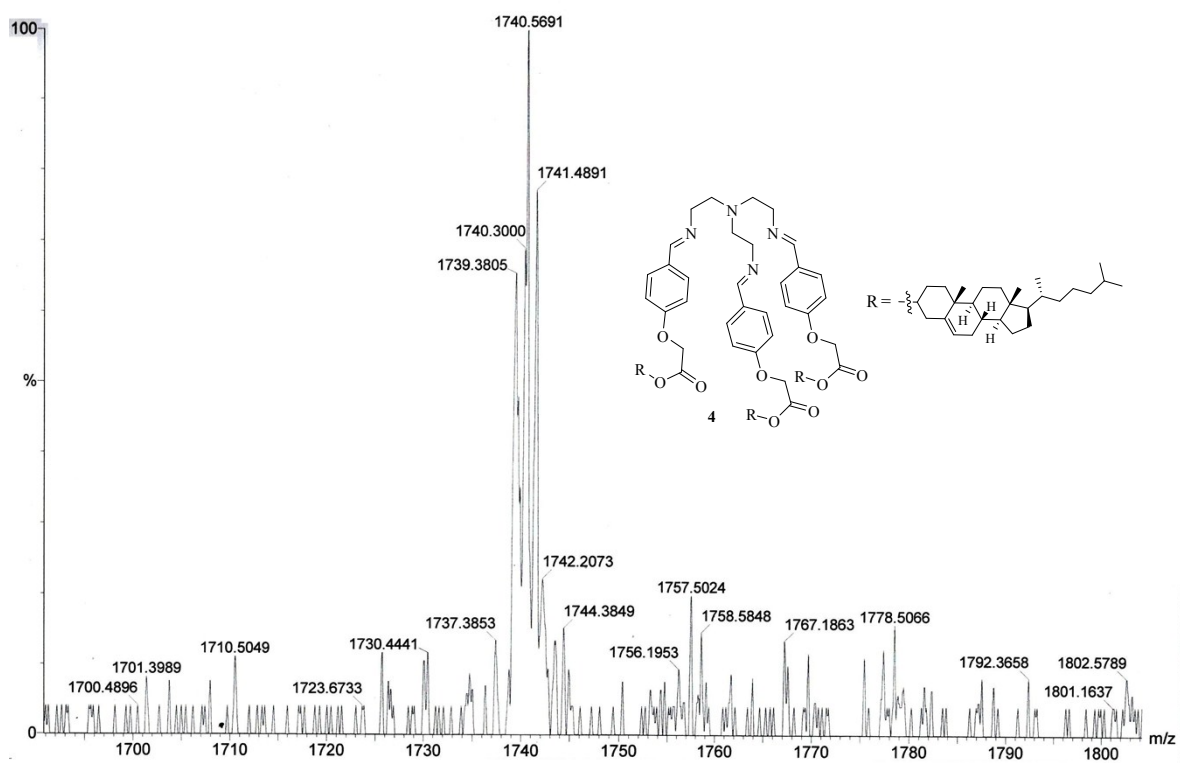

COSY spectrum of 4 (CDCl<sub>3</sub>, 500 MHz)

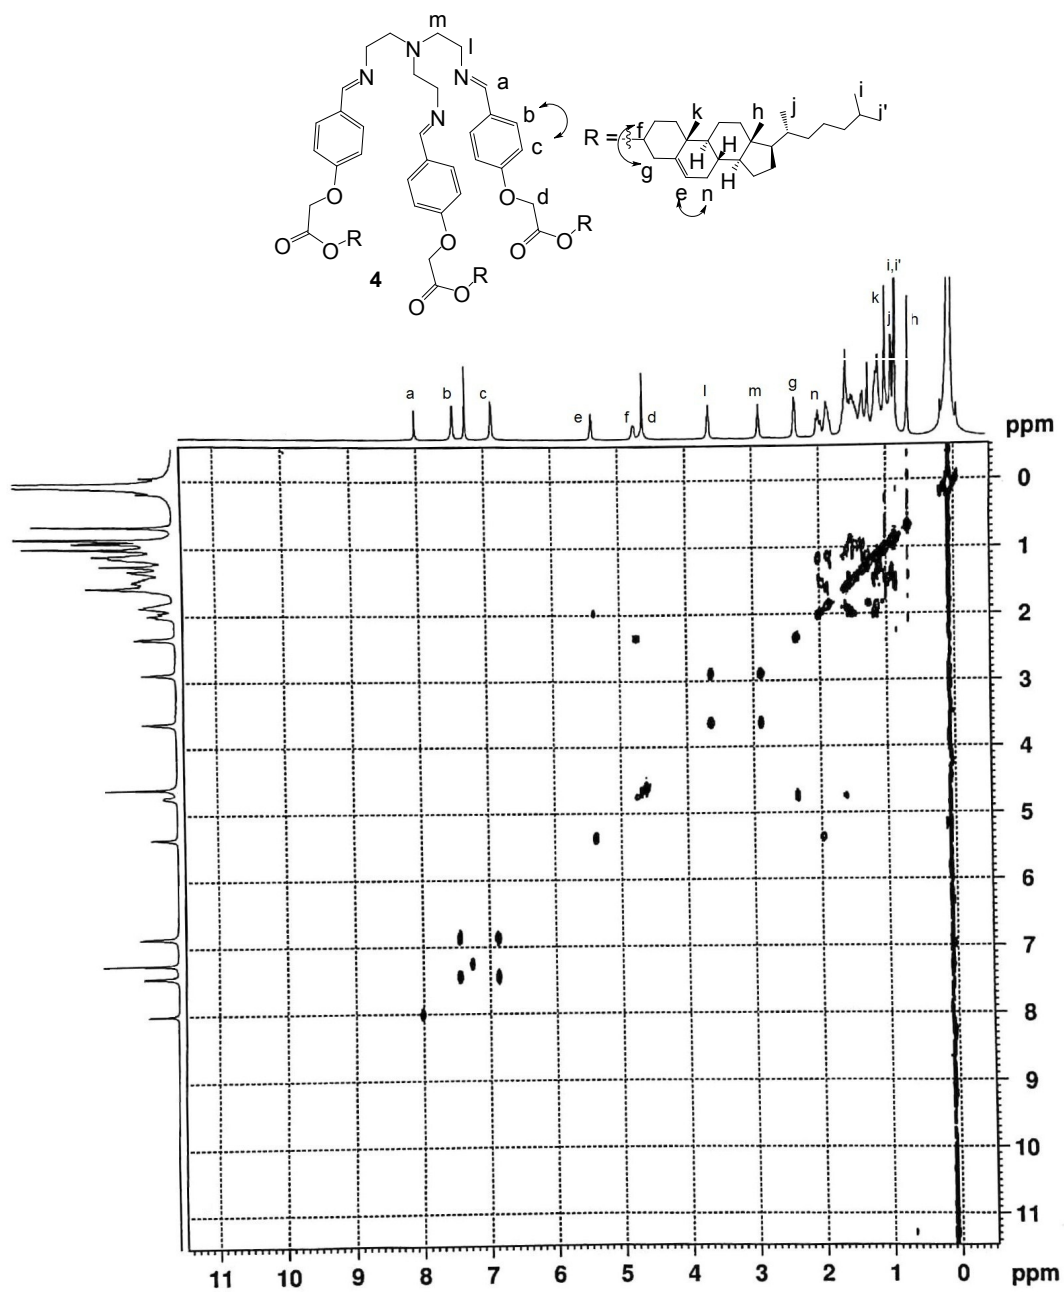

NOESY spectrum of 4 (CDCl<sub>3</sub>, 400 MHz)

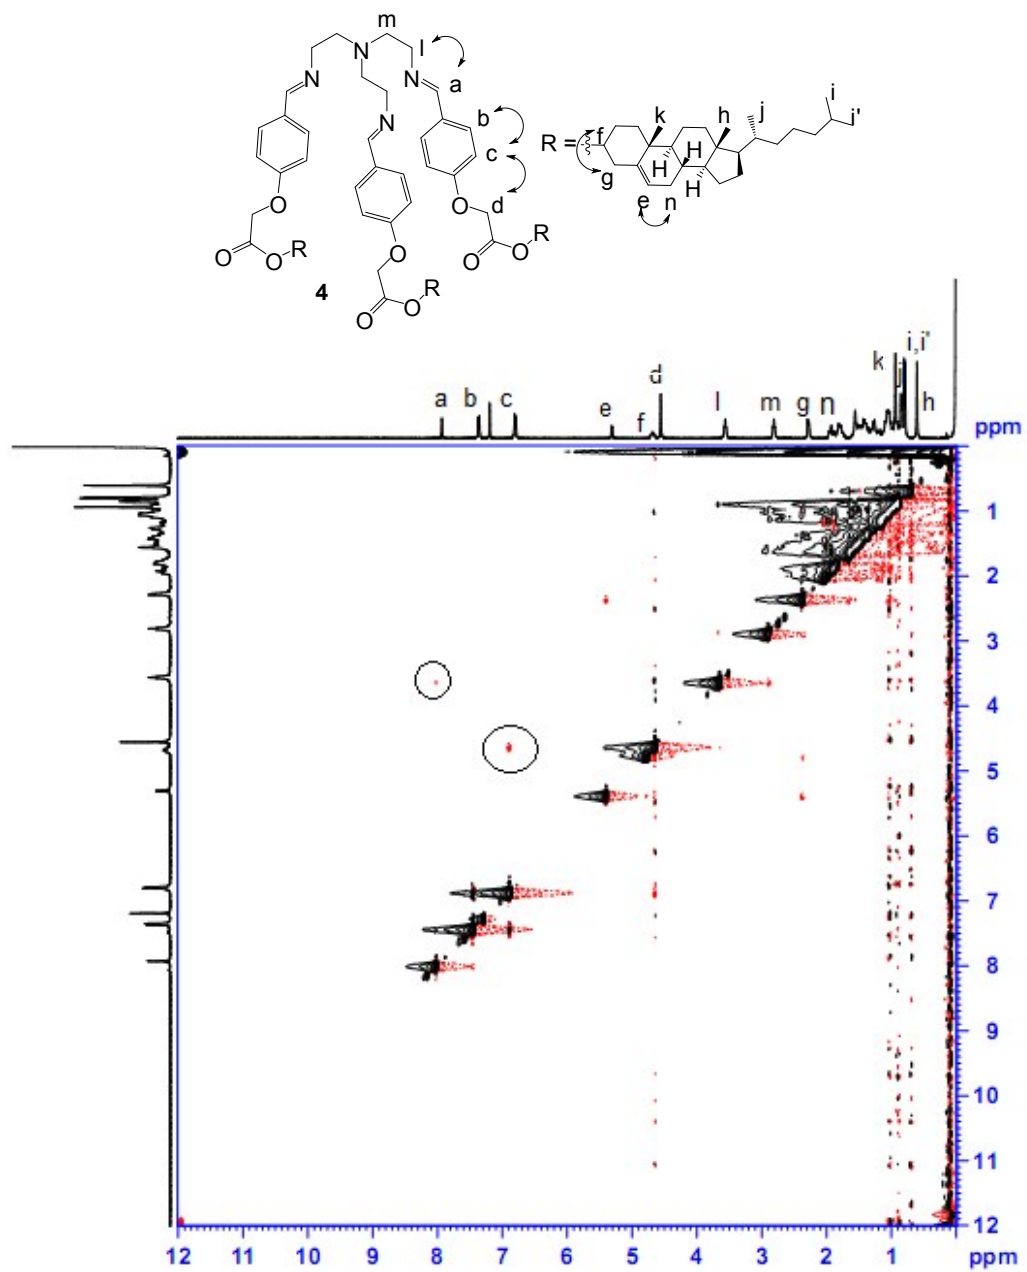

Partial NOESY spectrum of 4 (CDCl<sub>3</sub>, 400 MHz)

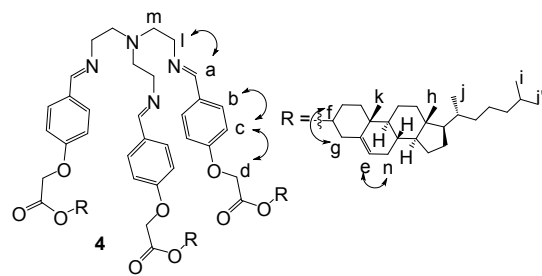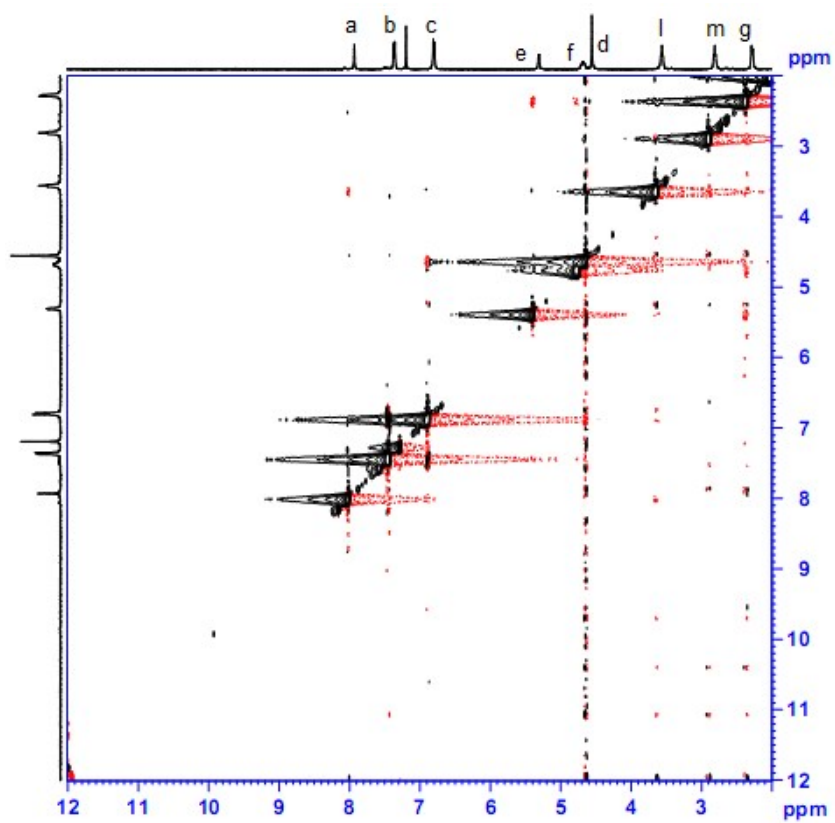

<sup>1</sup>H NMR of 5 (CDCl<sub>3</sub>, 400 MHz)

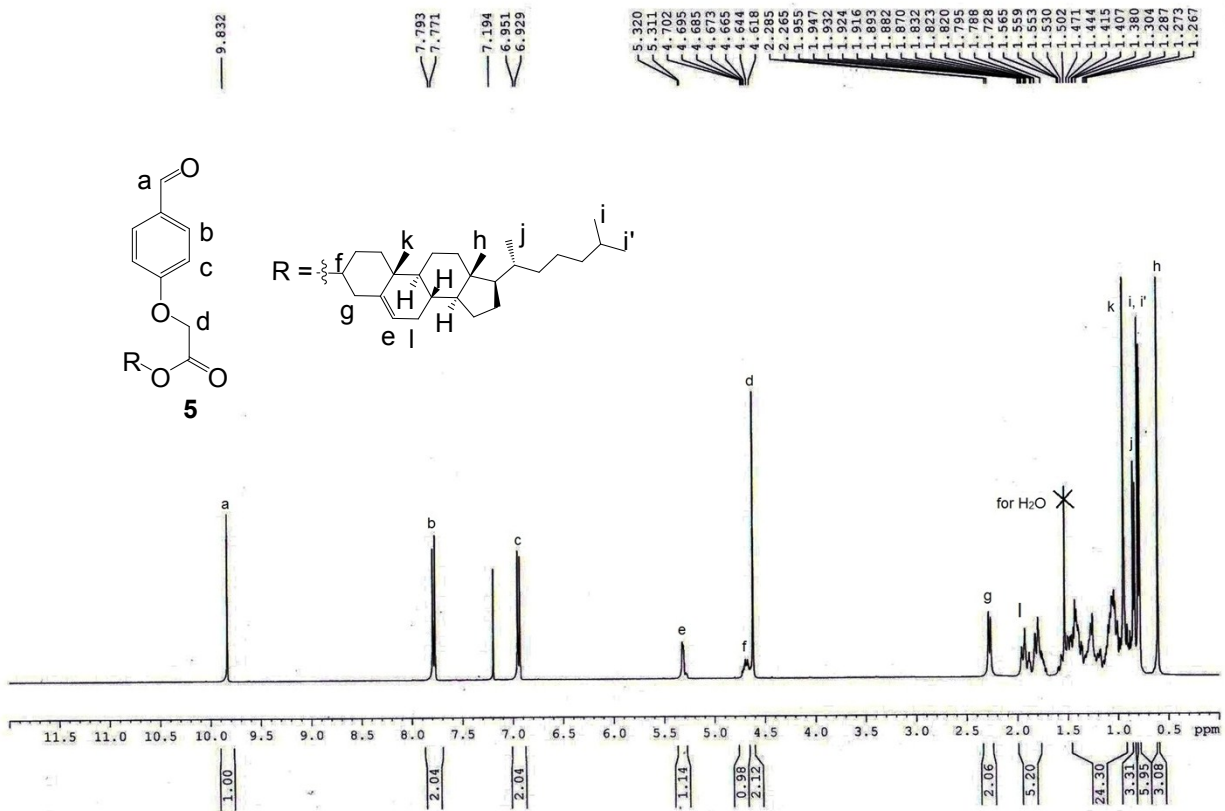

$^{13}\text{C}$  NMR of 5 ( $\text{CDCl}_3$ , 100 MHz)

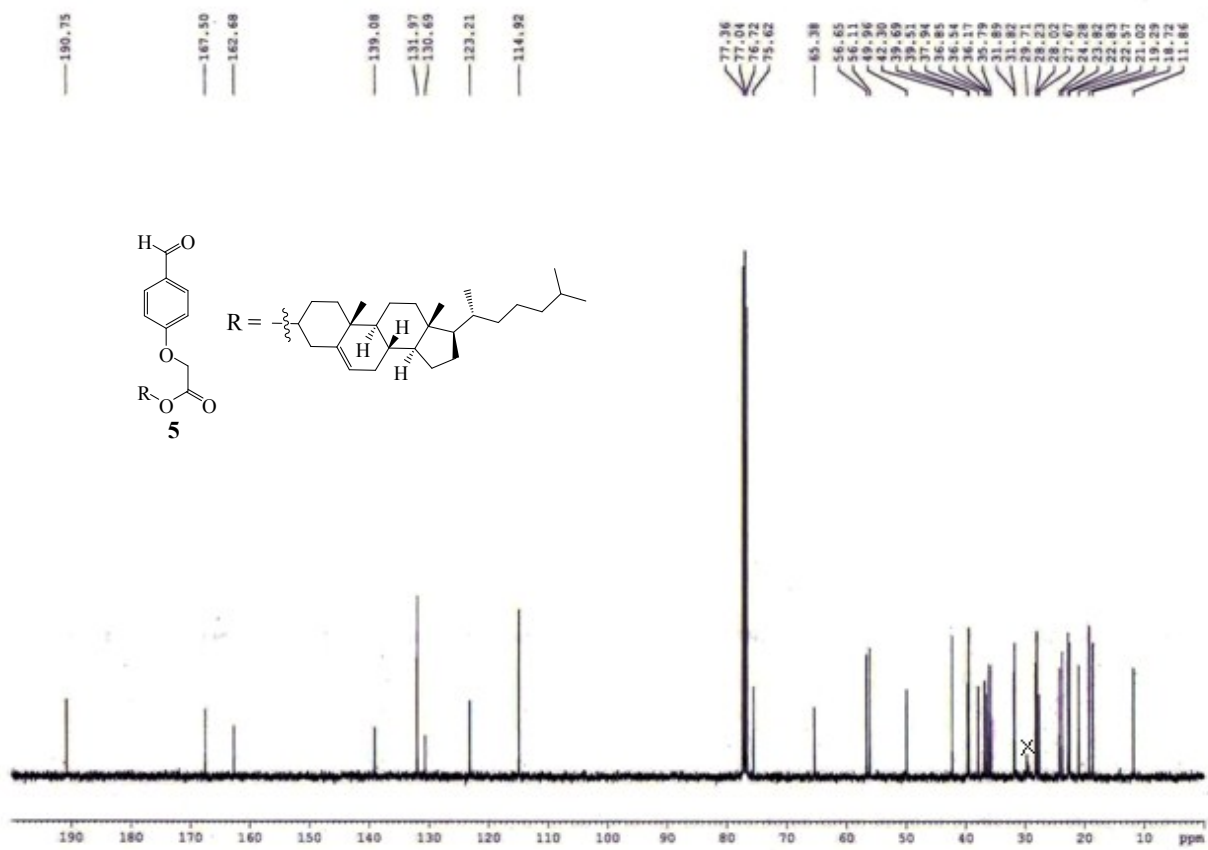



# Mass spectrum of 5.

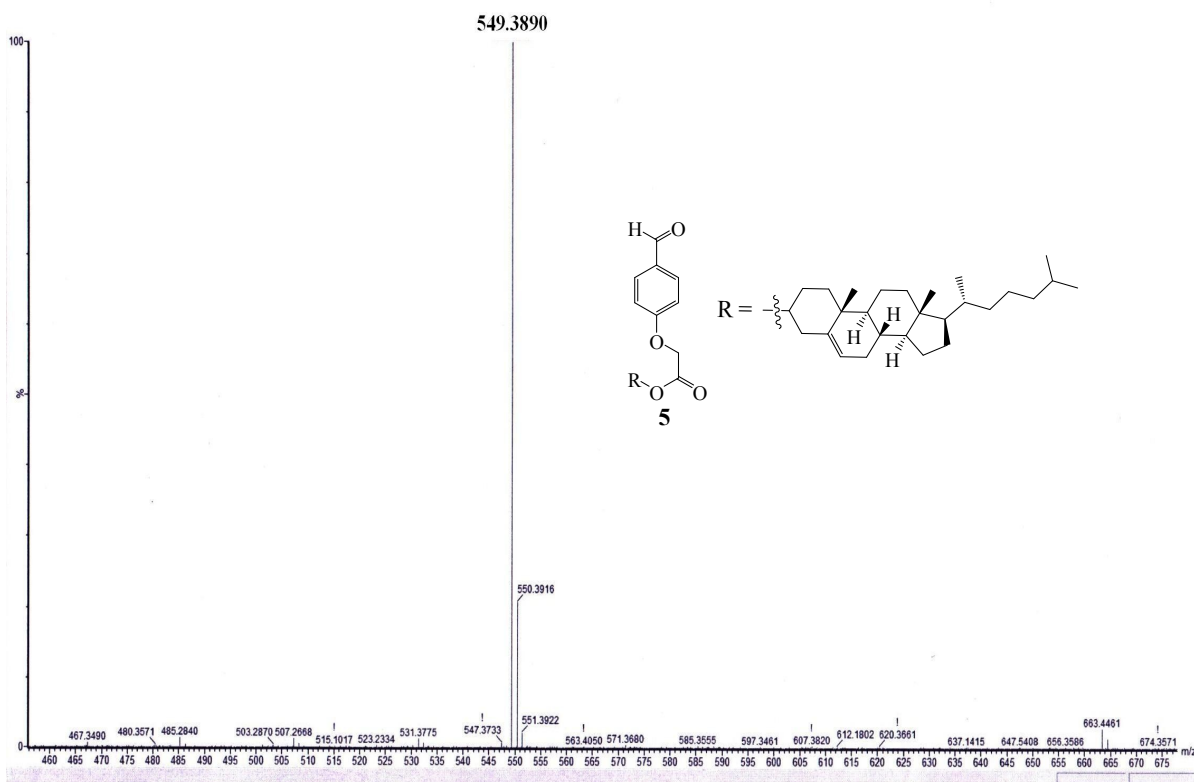

COSY spectrum of **5** (CDCl<sub>3</sub>, 500 MHz)

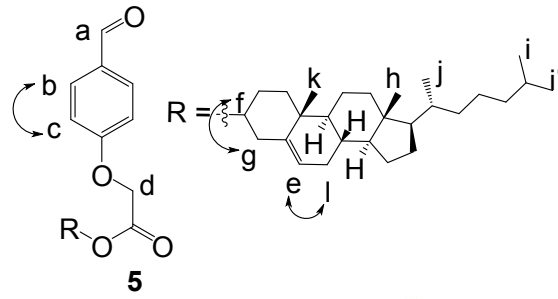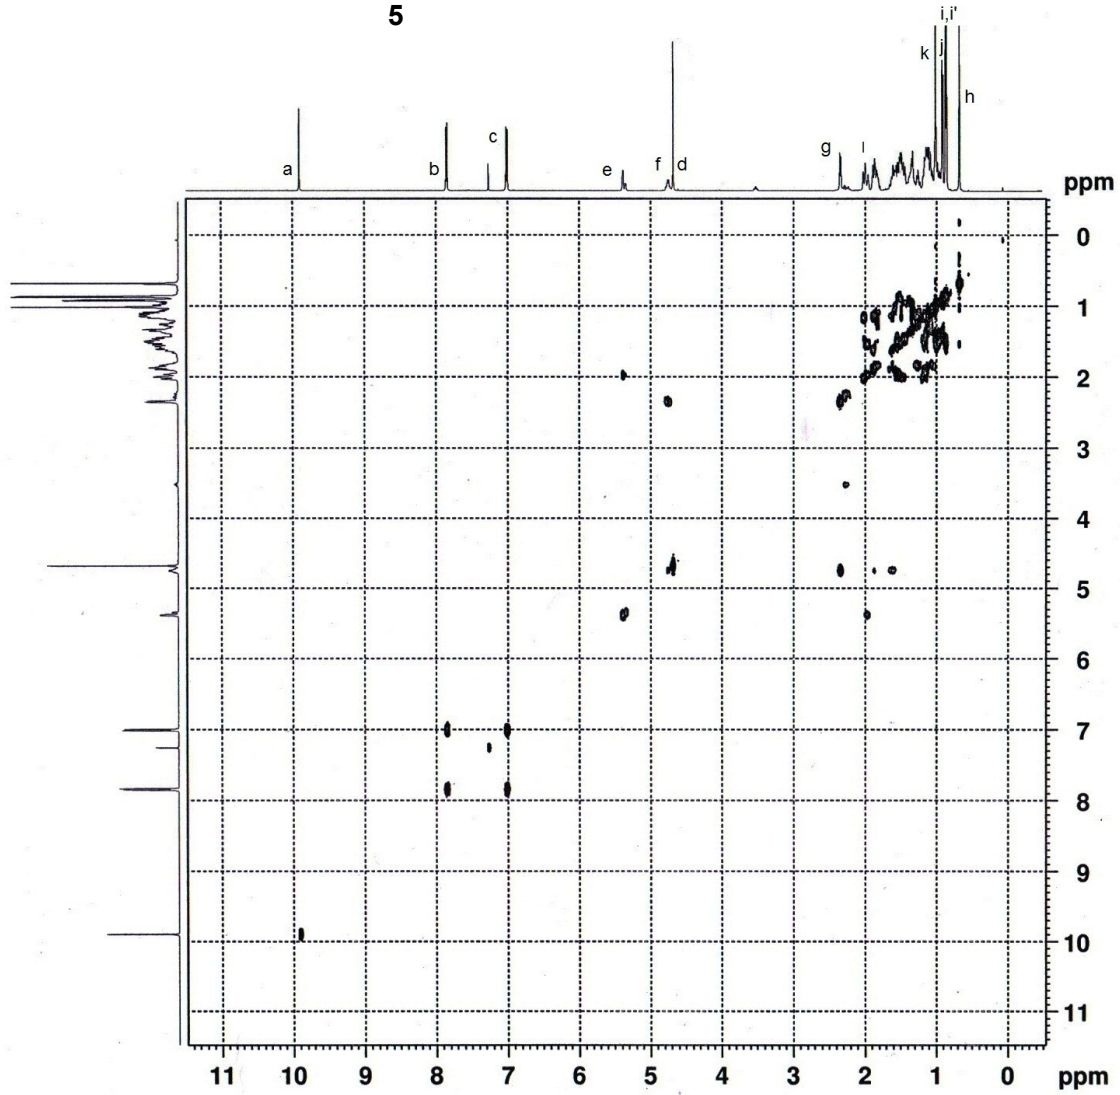

NOESY spectrum of 5 (CDCl<sub>3</sub>, 400 MHz)

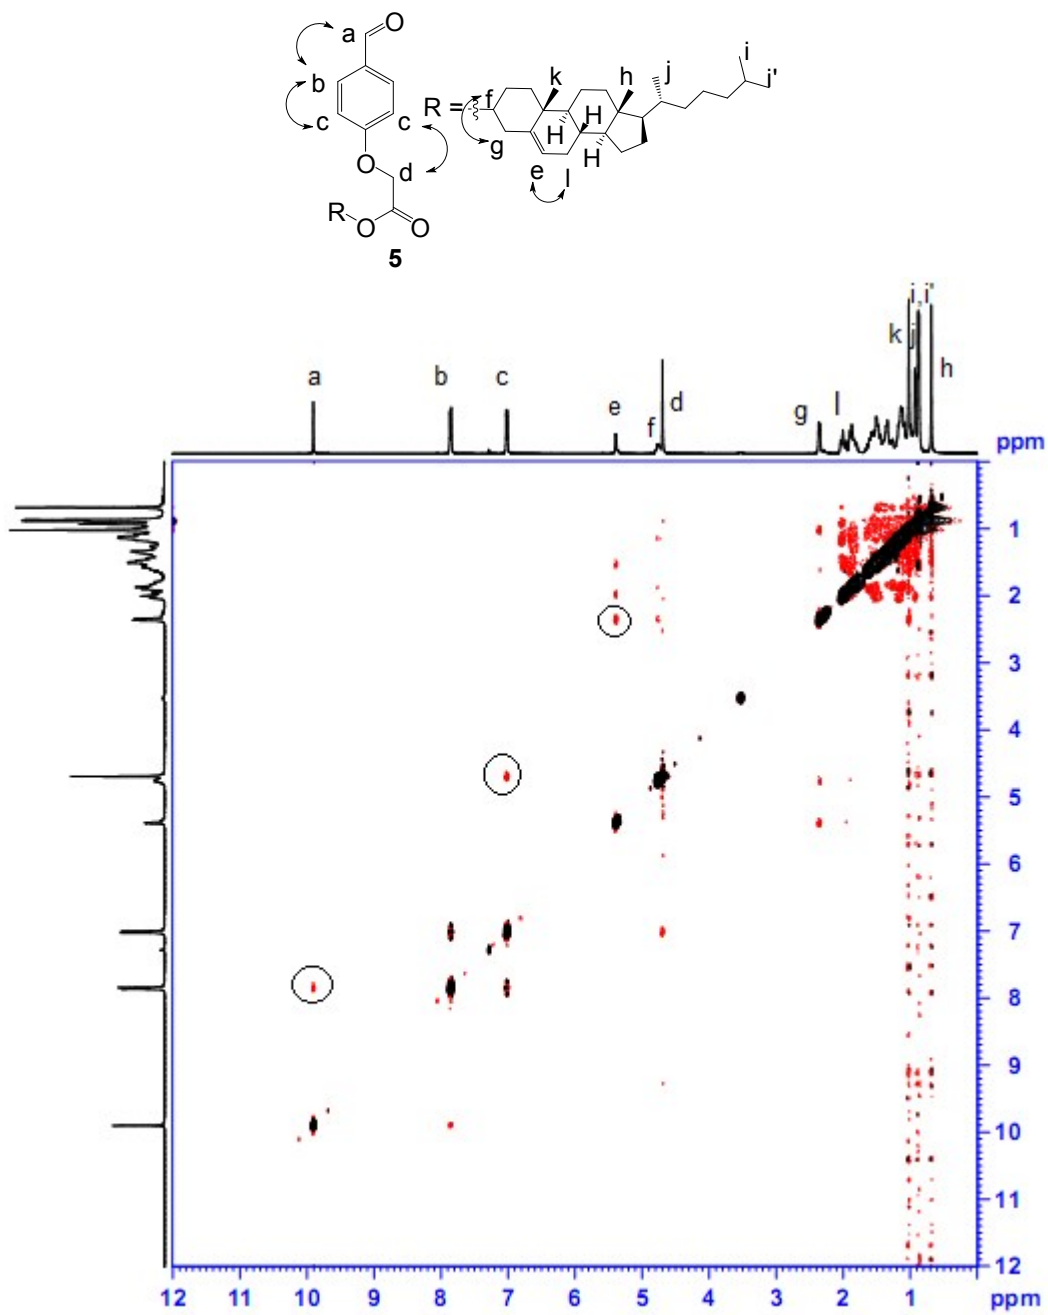

Partial NOESY spectrum of **5** (CDCl<sub>3</sub>, 400 MHz)

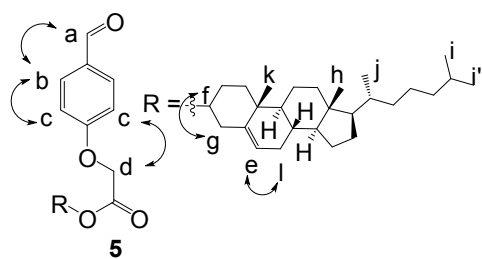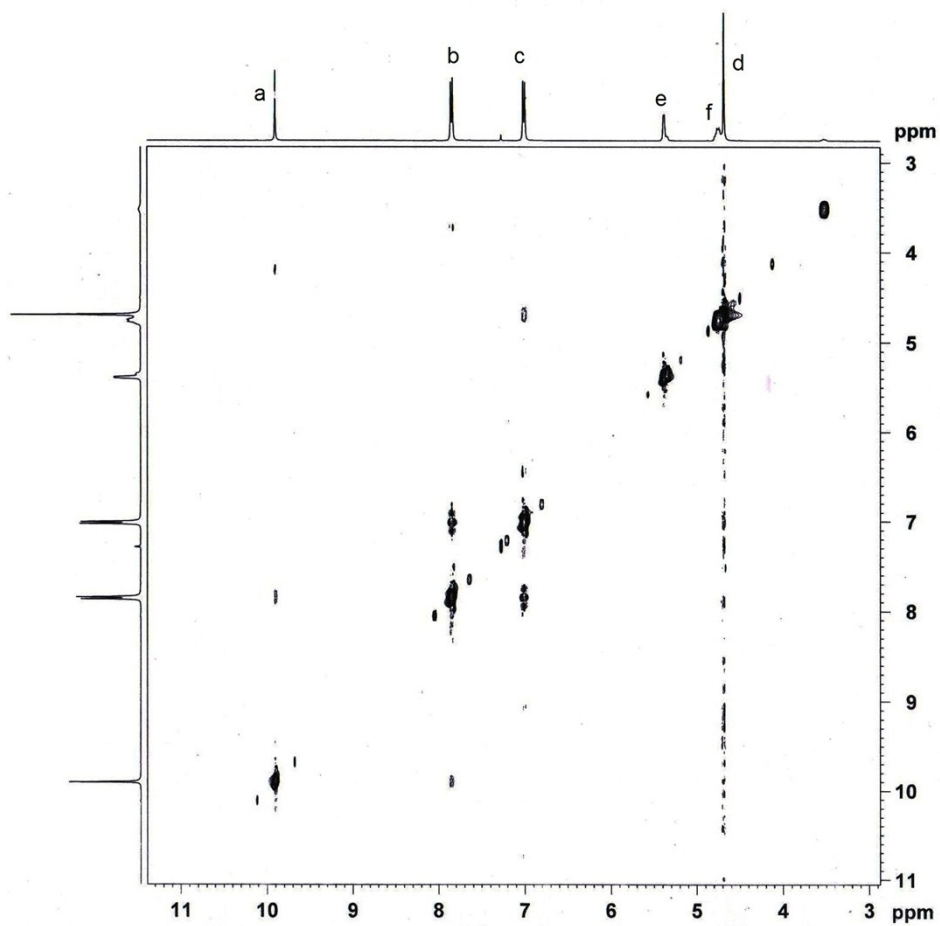

Partial FTIR spectra of compounds (a) 1, (b) 2, (c) 3, (d) 4 and (e) 5.

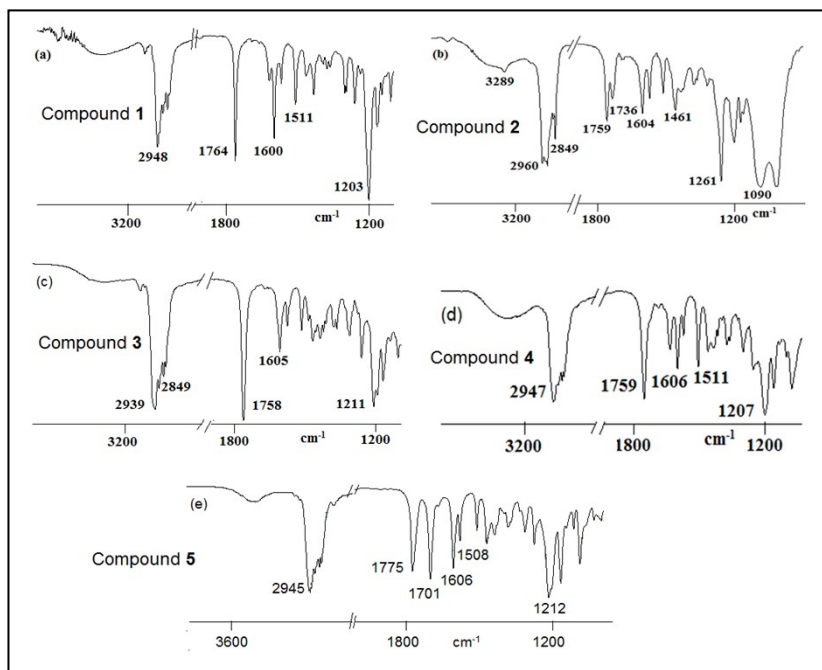

Supplement: c8nj05056b1.pdf [file c8nj05056b1.pdf]
